# Supplementary material for: The Role of HbA1c Determination in Detecting Unknown Glucose Disturbances in Ischemic Stroke
Source: PubMed Central journal article supplement (PMC4259295; doi:10.1371/journal.pone.0109960), 2014-12-08
Supplement: pone.0109960.s001.pdf [file pone.0109960.s001.pdf]

| Age | Sex | DM_Ver | DM_PDM | Hbglic | BMI   | WC  | diab_final | debutdm | glicini | nihini | e_TOAST_m | HT | Dyslip | PAD | CAD | FA | EnoL_Cur | Sm_Curr | eExitus | iExitus | rankhist |
|-----|-----|--------|--------|--------|-------|-----|------------|---------|---------|--------|-----------|----|--------|-----|-----|----|----------|---------|---------|---------|----------|
| 75  | 1   | 0,00   | 0      | 4,9    | 22,46 | 79  | 0          | 0       | 107     | 5      | 1         | 0  | 0      | 0   | 0   | 0  | 0        | 1       | 1       | 1       | 0        |
| 74  | 0   | 0,00   | 0      | 5,1    |       |     | 0          | 0       | 85      | 13     | 1         | 1  | 1      | 0   | 0   | 0  | 0        | 1       | 1       | 1       | 0        |
| 86  | 1   | 0,00   | 0      | 5,6    | 25,95 | 98  | 0          | 0       | 209     | 21     | 1         | 0  | 0      | 0   | 0   | 0  | 0        | 0       | 1       | 1       | 1        |
| 77  | 1   | 0,00   | 0      | 5,3    | 25,83 | 90  | 0          | 0       | 125     | 21     | 1         | 1  | 1      | 0   | 0   | 0  | 1        | 0       | 1       | 1       | 0        |
| 77  | 1   | 1,00   | 1      | 6,0    | 24,39 | 105 | 0          | 0       | 110     | 3      | 1         | 1  | 1      | 1   | 0   | 0  | 1        | 0       | 1       | 1       | 0        |
| 69  | 1   | 3,00   | 2      | 7,1    | 23,12 | 80  | 1          | 1       | 257     | 19     | 1         | 1  | 1      | 0   | 1   | 0  | 1        | 0       | 1       | 1       | 1        |
| 83  | 0   | 0,00   | 0      | 5,1    | 16,41 | 75  | 0          | 0       | 156     | 19     | 3         | 0  | 1      | 0   | 0   | 0  | 0        | 0       | 1       | 1       | 1        |
| 87  | 0   | 0,00   | 0      | 4,7    | 26,16 | 72  | 0          | 0       | 89      | 18     | 3         | 0  | 0      | 0   | 0   | 1  | 0        | 0       | 1       | 1       | 2        |
| 94  | 0   | 0,00   | 0      | 5,1    | 20,81 | 90  | 0          | 0       | 94      | 23     | 3         | 1  | 0      | 0   | 0   | 1  | 0        | 0       | 1       | 1       | 3        |
| 81  | 0   | 0,00   | 0      | 5,1    | 29,14 | 103 | 0          | 0       | 276     | 23     | 3         | 1  | 0      | 0   | 0   | 1  | 0        | 0       | 1       | 1       | 0        |
| 85  | 1   | 0,00   | 0      | 5,1    | 22,86 | 84  | 0          | 0       | 91      | 21     | 3         | 1  | 0      | 0   | 0   | 0  | 1        | 0       | 1       | 1       | 0        |
| 94  | 1   | 0,00   | 0      | 5,3    | 28,34 | 105 | 0          | 0       | 116     | 17     | 3         |    | 0      | 0   | 0   | 1  | 0        | 0       | 1       | 1       | 3        |
| 87  | 1   | 0,00   | 0      | 4,6    | 25,10 | 82  | 0          | 0       | 97      | 16     | 3         | 1  | 1      | 0   | 1   | 0  | 0        | 0       | 1       | 1       | 3        |
| 93  | 0   | 0,00   | 0      | 4,6    | 20,81 | 80  | 0          | 0       | 114     | 20     | 3         | 1  | 0      | 0   | 0   | 1  | 0        | 0       | 1       | 1       | 0        |
| 81  | 0   | 0,00   | 0      | 5,5    | 24,84 | 109 | 0          | 0       | 208     | 15     | 3         | 1  | 0      | 0   | 1   | 1  | 0        | 0       | 1       | 1       | 0        |
| 91  | 0   | 0,00   | 0      | 5,1    | 28,93 | 95  | 0          | 0       | 183     | 16     | 3         | 1  | 0      | 0   | 0   | 1  | 0        | 0       | 1       | 1       | 0        |
| 69  | 0   | 0,00   | 0      | 4,7    | 31,25 | 104 | 0          | 0       | 119     | 24     | 3         | 0  | 0      | 0   | 0   | 1  | 0        | 0       | 1       | 1       | 1        |
| 71  | 0   | 0,00   | 0      | 5,5    |       |     | 0          | 0       | 166     | 19     | 3         | 1  | 1      | 0   | 0   | 1  |          |         | 1       | 1       | 0        |
| 82  | 1   | 0,00   | 0      | 5,3    | 27,68 |     | 0          | 0       | 128     | 21     | 3         | 1  | 0      | 0   | 0   | 1  | 0        | 0       | 1       | 1       | 0        |
| 99  | 0   | 0,00   | 0      | 5,0    | 35,56 | 95  | 0          | 0       | 126     | 20     | 3         | 1  | 1      | 0   | 0   | 1  | 0        | 0       | 1       | 1       | 1        |
| 86  | 0   | 0,00   | 0      | 5,4    | 28,40 | 103 | 0          | 0       | 116     | 19     | 3         | 1  | 0      | 0   | 0   | 1  | 0        | 0       | 1       | 1       | 0        |
| 85  | 0   | 0,00   | 0      | 5,0    |       |     | 0          | 0       | 144     | 31     | 3         | 1  | 0      | 0   |     | 1  | 0        |         | 1       | 1       | 0        |
| 85  | 0   | 0,00   | 0      | 5,6    | 22,04 |     | 0          | 0       | 122     | 21     | 3         | 1  | 1      | 0   |     | 1  | 0        | 0       | 1       | 1       | 3        |
| 92  | 0   | 0,00   | 0      | 5,6    | 27,06 |     | 0          | 0       | 125     | 17     | 3         | 0  | 1      | 0   | 1   | 1  | 0        | 0       | 1       | 1       | 3        |
| 83  | 1   | 0,00   | 0      | 4,7    | 21,67 |     | 0          | 0       | 104     | 20     | 3         | 1  | 0      | 0   | 0   | 1  | 0        | 0       | 1       | 1       | 2        |
| 83  | 1   | 0,00   | 0      | 5,2    | 53,58 | 97  | 0          | 0       | 114     | 12     | 3         | 0  | 0      | 0   | 0   | 1  | 0        | 0       | 1       | 1       | 0        |
| 90  | 0   | 0,00   | 0      | 5,3    | 23,14 | 80  | 0          | 0       | 127     | 21     | 3         | 1  | 0      | 0   | 0   | 1  | 0        | 0       | 1       | 1       | 1        |
| 85  | 0   | 0,00   | 0      | 5,6    | 22,22 | 92  | 0          | 0       | 109     | 18     | 3         | 1  | 0      | 0   | 0   | 1  | 0        | 0       | 1       | 1       | 2        |
| 79  | 1   | 0,00   | 0      | 5,1    | 22,53 | 90  | 0          | 0       | 159     | 23     | 3         | 1  | 0      | 0   | 0   | 1  | 0        | 0       | 1       | 1       | 2        |
| 89  | 0   | 0,00   | 0      | 5,3    | 23,44 | 105 | 0          | 0       | 104     | 10     | 3         | 1  | 1      | 0   | 0   | 1  | 0        | 0       | 1       | 1       | 0        |
| 69  | 1   | 0,00   | 0      | 5,5    | 27,68 | 92  | 0          | 0       | 120     | 21     | 3         | 1  | 1      | 0   | 0   | 1  | 0        | 0       | 1       | 1       | 1        |
| 79  | 0   | 0,00   | 0      | 5,3    | 35,56 | 73  | 0          | 0       | 137     | 17     | 3         | 1  | 0      | 0   | 0   | 1  | 0        | 0       | 1       | 1       | 0        |
| 64  | 0   | 1,00   | 1      | 5,9    | 42,97 | 120 | 0          | 0       | 109     | 23     | 3         | 1  | 0      | 0   | 0   | 1  | 0        | 0       | 1       | 1       | 0        |
| 88  | 1   | 1,00   | 1      | 5,7    |       |     | 0          | 0       | 144     | 16     | 3         | 1  | 0      | 0   | 0   | 1  | 0        | 0       | 1       | 1       | 0        |
| 79  | 1   | 1,00   | 1      | 6,3    | 23,15 |     | 0          | 0       | 126     | 17     | 3         | 0  | 0      | 0   | 1   | 1  | 1        | 0       | 1       | 1       | 0        |
| 92  | 0   | 1,00   | 1      | 6,2    |       |     | 0          | 0       | 187     | 23     | 3         | 1  | 0      | 0   | 0   | 1  | 0        |         | 1       | 1       | 2        |

|    |   |      |   |     |       |     |   |   |     |    |   |   |   |   |   |   |   |   |   |   |   |
|----|---|------|---|-----|-------|-----|---|---|-----|----|---|---|---|---|---|---|---|---|---|---|---|
| 87 | 0 | 1,00 | 1 | 6,0 | 26,67 | 94  | 0 | 0 | 102 | 20 | 3 | 1 | 0 | 0 | 0 | 1 | 0 | 0 | 1 | 1 | 3 |
| 90 | 0 | 1,00 | 1 | 6,2 | 33,79 | 104 | 0 | 0 | 108 | 9  | 3 | 1 | 1 | 0 | 0 | 1 | 0 | 0 | 1 | 1 | 3 |
| 75 | 0 | 1,00 | 1 | 6,2 | 27,64 | 87  | 0 | 0 | 108 | 14 | 3 | 1 | 0 | 0 | 1 | 1 | 0 | 0 | 1 | 1 | 0 |
| 87 | 0 | 1,00 | 1 | 6,4 |       |     | 0 | 0 | 223 | 20 | 3 | 1 | 0 | 0 | 0 | 1 | 0 | 0 | 1 | 1 | 0 |
| 71 | 0 | 3,00 | 2 | 8,3 | 27,55 | 105 | 1 | 1 | 251 | 16 | 3 | 1 | 1 | 0 | 0 | 1 | 0 | 0 | 1 | 1 | 1 |
| 83 | 0 | 3,00 | 2 | 8,3 | 27,66 | 92  | 1 | 1 | 177 | 19 | 3 | 1 | 1 | 0 | 0 | 1 | 0 | 0 | 1 | 1 | 2 |
| 94 | 0 | 3,00 | 2 | 6,7 | 23,61 | 75  | 1 | 1 | 215 | 25 | 3 | 0 | 0 | 0 | 1 | 1 | 0 | 0 | 1 | 1 | 2 |
| 90 | 0 | 3,00 | 2 | 6,5 | 26,67 |     | 1 | 1 | 195 | 22 | 3 | 0 | 0 | 1 | 1 | 1 | 0 | 0 | 1 | 1 | 3 |
| 82 | 0 | 3,00 | 2 | 6,5 | 27,34 |     | 1 | 1 | 218 | 22 | 3 | 1 | 0 | 0 | 0 | 1 | 0 | 0 | 1 | 1 | 0 |
| 73 | 1 | 3,00 | 2 | 6,7 |       |     | 1 | 1 | 121 | 23 | 3 | 0 | 0 | 0 | 0 | 1 | 1 |   | 1 | 1 | 0 |
| 88 | 0 | 2,00 | 2 | 7,0 | 29,38 | 110 | 1 | 1 | 159 | 21 | 3 | 1 | 0 | 0 | 0 | 1 | 0 | 0 | 1 | 1 | 2 |
| 87 | 0 | 2,00 | 2 | 7,6 | 25,81 | 80  | 1 | 1 | 115 | 23 | 3 | 1 | 1 | 0 | 0 | 1 | 0 | 0 | 1 | 1 | 0 |
| 81 | 0 | 0,00 | 0 | 5,2 | 36,44 | 135 | 0 | 0 | 107 | 16 | 4 |   | 0 | 0 | 0 | 0 | 0 | 0 | 1 | 1 | 0 |
| 85 | 0 | 0,00 | 0 | 5,2 | 35,56 | 90  | 0 | 0 | 132 | 19 | 4 | 0 | 0 | 0 | 0 | 0 | 0 | 0 | 1 | 1 | 2 |
| 86 | 1 | 0,00 | 0 | 5,4 | 27,34 | 97  | 0 | 0 | 74  | 8  | 4 | 0 | 0 | 0 | 0 | 1 | 1 | 0 | 1 | 1 | 2 |
| 53 | 1 | 0,00 | 0 | 5,5 | 19,03 | 86  | 0 | 0 | 84  | 18 | 4 | 0 | 0 | 0 | 0 | 1 | 0 | 1 | 1 | 1 | 1 |
| 99 | 0 | 0,00 | 0 | 5,5 |       |     | 0 | 0 | 135 | 18 | 4 | 1 | 0 | 0 | 0 | 0 | 0 | 0 | 1 | 1 | 3 |
| 81 | 1 | 0,00 | 0 | 5,1 | 24,49 | 120 | 0 | 0 | 98  | 21 | 4 | 1 | 0 | 0 | 1 | 1 | 1 | 1 | 1 | 1 | 3 |
| 78 | 0 | 1,00 | 1 | 5,5 | 34,05 | 90  | 0 | 0 | 132 | 22 | 4 | 1 | 1 | 0 | 0 | 0 | 0 | 0 | 1 | 1 | 0 |
| 68 | 1 | 1,00 | 1 | 5,8 | 22,55 |     | 0 | 0 | 269 | 9  | 4 | 1 | 1 | 1 | 0 | 1 | 0 | 0 | 1 | 1 | 1 |
| 90 | 0 | 1,00 | 1 | 6,4 | 31,11 | 92  | 0 | 0 | 111 | 18 | 4 | 1 | 1 | 0 | 0 | 0 | 0 | 0 | 1 | 1 | 3 |
| 63 | 1 | 0,00 | 0 | 5,3 | 25,10 | 95  | 0 | 0 | 139 | 22 | 1 | 0 | 0 | 1 | 0 | 0 | 0 | 1 | 1 | 0 | 0 |
| 72 | 1 | 1,00 | 1 | 6,0 | 32,65 | 110 | 0 | 0 | 168 | 24 | 1 | 1 | 1 | 0 | 0 | 0 | 1 | 0 | 1 | 0 | 0 |
| 98 | 0 | 0,00 | 0 | 5,1 | 25,11 | 89  | 0 | 0 | 110 | 17 | 2 | 1 | 1 | 0 | 0 | 1 | 0 | 0 | 1 | 0 | 3 |
| 95 | 0 | 0,00 | 0 | 4,6 | 21,33 | 78  | 0 | 0 | 111 | 11 | 3 | 1 | 0 | 0 | 0 | 1 | 0 | 0 | 1 | 0 | 0 |
| 76 | 0 | 0,00 | 0 | 4,6 | 24,61 | 97  | 0 | 0 | 129 | 17 | 3 | 1 | 1 | 0 | 0 | 1 | 0 | 0 | 1 | 0 | 0 |
| 88 | 0 | 0,00 | 0 | 4,9 | 26,30 | 111 | 0 | 0 | 106 | 14 | 3 | 0 | 0 | 0 | 0 | 1 | 0 | 0 | 1 | 0 | 1 |
| 81 | 0 | 0,00 | 0 | 5,0 | 29,30 | 114 | 0 | 0 | 106 | 16 | 3 | 1 | 0 | 0 | 0 | 1 | 0 | 0 | 1 | 0 | 0 |
| 91 | 0 | 0,00 | 0 | 4,0 | 28,30 | 85  | 0 | 0 | 144 | 17 | 3 | 1 | 0 | 0 | 0 | 1 | 0 | 0 | 1 | 0 | 0 |
| 83 | 1 | 0,00 | 0 | 4,1 | 28,71 | 83  | 0 | 0 | 92  | 14 | 3 | 0 | 0 | 1 | 0 | 1 | 0 | 0 | 1 | 0 | 0 |
| 91 | 1 | 0,00 | 0 | 5,1 | 23,53 | 78  | 0 | 0 | 157 | 17 | 3 | 1 | 0 | 0 | 0 | 1 | 0 | 0 | 1 | 0 | 1 |
| 98 | 0 | 0,00 | 0 | 4,9 | 27,24 | 90  | 0 | 0 | 103 | 8  | 3 | 0 | 0 | 0 | 0 | 1 | 0 | 0 | 1 | 0 | 3 |
| 81 | 1 | 0,00 | 0 | 5,3 | 23,31 | 127 | 0 | 0 | 110 | 18 | 3 | 0 | 0 | 0 | 0 | 1 | 0 | 0 | 1 | 0 | 2 |
| 71 | 1 | 0,00 | 0 | 5,5 | 26,87 |     | 0 | 0 | 107 | 18 | 3 | 1 | 0 | 0 | 0 | 1 | 0 | 0 | 1 | 0 | 0 |
| 91 | 0 | 0,00 | 0 | 5,5 |       |     | 0 | 0 | 73  | 6  | 3 | 1 | 1 | 0 | 1 | 1 | 0 | 0 | 1 | 0 | 2 |
| 79 | 0 | 0,00 | 0 | 5,4 | 20,81 | 63  | 0 | 0 | 100 | 17 | 3 | 0 | 0 | 0 | 0 | 1 | 0 | 0 | 1 | 0 | 1 |
| 85 | 1 | 0,00 | 0 | 5,6 | 22,49 | 93  | 0 | 0 | 92  | 6  | 3 | 1 | 0 | 0 | 0 | 1 | 0 | 0 | 1 | 0 | 2 |

|    |   |      |   |     |       |     |   |   |     |    |   |   |   |   |   |   |   |   |   |   |   |
|----|---|------|---|-----|-------|-----|---|---|-----|----|---|---|---|---|---|---|---|---|---|---|---|
| 82 | 0 | 0,00 | 0 | 5,6 | 24,61 | 90  | 0 | 0 | 98  | 5  | 3 | 1 | 1 | 0 | 0 | 1 | 0 | 0 | 1 | 0 | 2 |
| 81 | 1 | 0,00 | 0 | 5,5 | 29,76 | 110 | 0 | 0 | 95  | 3  | 3 | 0 | 1 | 0 | 0 | 1 | 0 | 0 | 1 | 0 | 0 |
| 77 | 1 | 1,00 | 1 | 5,3 | 30,07 |     | 0 | 0 | 108 | 2  | 3 | 1 | 0 | 0 | 0 | 1 | 0 | 0 | 1 | 0 | 1 |
| 70 | 1 | 1,00 | 1 | 6,1 |       |     | 0 | 0 | 115 | 4  | 3 | 1 | 0 | 0 | 0 | 1 | 1 | 0 | 1 | 0 | 0 |
| 76 | 0 | 1,00 | 1 | 5,7 | 28,91 | 102 | 0 | 0 | 170 | 14 | 3 | 1 | 0 | 0 | 0 | 1 | 0 | 0 | 1 | 0 | 0 |
| 86 | 0 | 1,00 | 1 | 6,0 | 26,04 | 105 | 0 | 0 | 96  | 19 | 3 | 1 | 0 | 0 | 0 | 1 | 0 | 0 | 1 | 0 | 3 |
| 85 | 0 | 1,00 | 1 | 6,1 | 26,67 | 107 | 0 | 0 | 160 | 19 | 3 | 1 | 0 | 0 | 0 | 1 | 0 | 0 | 1 | 0 | 2 |
| 95 | 0 | 1,00 | 1 | 5,8 | 16,53 | 75  | 0 | 0 | 204 | 19 | 3 | 1 | 1 | 0 | 0 | 1 | 0 | 0 | 1 | 0 | 3 |
| 68 | 1 | 1,00 | 1 | 6,0 | 24,22 | 106 | 0 | 0 | 86  | 19 | 3 | 1 | 0 | 0 | 0 | 1 | 0 | 0 | 1 | 0 | 3 |
| 89 | 0 | 1,00 | 1 | 6,0 | 23,44 |     | 0 | 0 | 137 | 20 | 3 | 1 | 0 | 1 | 0 | 1 | 0 | 0 | 1 | 0 | 1 |
| 87 | 1 | 1,00 | 1 | 6,1 | 21,56 | 93  | 0 | 0 | 85  | 2  | 3 | 1 | 0 | 0 | 1 | 1 | 0 | 0 | 1 | 0 | 3 |
| 95 | 0 | 1,00 | 1 | 6,3 | 26,67 | 92  | 0 | 0 | 144 | 12 | 3 | 1 | 0 | 0 | 1 | 1 | 0 | 0 | 1 | 0 | 3 |
| 68 | 0 | 1,00 | 1 | 5,8 | 29,09 | 104 | 0 | 0 | 118 | 5  | 3 | 1 | 1 | 0 | 0 | 1 | 0 | 0 | 1 | 0 | 0 |
| 99 | 0 | 1,00 | 1 | 5,7 | 22,04 |     | 0 | 0 | 87  | 22 | 3 | 1 | 1 | 0 | 0 | 1 | 0 | 0 | 1 | 0 | 3 |
| 86 | 0 | 1,00 | 1 | 6,1 | 33,33 | 110 | 0 | 0 | 107 | 4  | 3 | 1 | 0 | 0 | 0 | 0 | 0 | 0 | 1 | 0 | 3 |
| 88 | 0 | 3,00 | 2 | 7,0 | 26,30 | 101 | 1 | 1 | 100 | 23 | 3 | 1 | 1 | 0 | 0 | 1 | 0 | 0 | 1 | 0 | 0 |
| 77 | 0 | 0,00 | 0 | 5,5 | 31,25 | 108 | 0 | 0 | 112 | 4  | 4 | 1 | 1 | 0 | 0 | 1 | 0 | 0 | 1 | 0 | 1 |
| 93 | 0 | 0,00 | 0 | 5,4 | 31,11 | 110 | 0 | 0 | 170 | 21 | 4 | 1 | 0 | 0 | 0 | 0 | 0 | 0 | 1 | 0 | 3 |
| 87 | 1 | 0,00 | 0 | 4,8 |       |     | 0 | 0 | 120 | 13 | 4 | 1 | 0 | 0 | 0 | 0 | 0 | 0 | 1 | 0 | 3 |
| 87 | 0 | 0,00 | 0 | 5,0 |       |     | 0 | 0 | 120 | 12 | 4 | 1 | 1 | 0 | 0 | 0 | 0 | 0 | 1 | 0 | 3 |
| 80 | 0 | 0,00 | 0 | 5,4 | 27,24 |     | 0 | 0 | 127 | 22 | 4 | 1 | 0 | 0 | 0 | 0 | 0 | 0 | 1 | 0 | 1 |
| 85 | 1 | 0,00 | 0 | 5,6 | 35,55 | 106 | 0 | 0 | 112 | 16 | 4 | 1 | 0 | 0 | 0 | 0 | 0 | 0 | 1 | 0 | 2 |
| 87 | 1 | 1,00 | 1 | 5,9 |       |     | 0 | 0 | 116 | 20 | 4 | 1 | 1 | 0 | 0 | 0 | 0 | 0 | 1 | 0 | 0 |
| 88 | 1 | 1,00 | 1 | 5,7 | 23,44 | 90  | 0 | 0 | 114 | 7  | 4 | 0 | 0 | 0 | 0 | 0 | 0 | 0 | 1 | 0 | 0 |
| 75 | 1 | 1,00 | 1 | 6,0 | 29,40 | 96  | 0 | 0 | 122 | 12 | 4 | 1 | 1 | 0 | 0 | 0 | 0 | 0 | 1 | 0 | 1 |
| 82 | 1 | 3,00 | 2 | 6,8 | 28,89 | 90  | 1 | 1 | 210 | 21 | 4 | 0 | 1 | 0 | 0 | 0 | 1 | 1 | 1 | 0 | 2 |
| 58 | 1 | 0,00 | 0 | 4,9 | 20,28 | 85  | 0 | 0 | 88  | 4  | 1 | 0 | 1 | 0 | 0 | 0 | 0 | 1 | 0 | 0 | 1 |
| 81 | 0 | 0,00 | 0 | 4,9 | 31,99 | 115 | 0 | 0 | 110 | 1  | 1 | 1 | 1 | 0 | 1 | 0 | 0 | 0 | 0 | 0 | 1 |
| 55 | 1 | 0,00 | 0 | 4,9 | 26,26 | 100 | 0 | 0 | 95  | 1  | 1 | 1 | 0 | 0 | 0 | 0 | 0 | 1 | 0 | 0 | 0 |
| 55 | 1 | 0,00 | 0 | 4,7 | 23,70 | 89  | 0 | 0 | 133 | 8  | 1 | 0 | 0 | 0 | 0 | 0 | 0 | 1 | 0 | 0 | 0 |
| 85 | 0 | 0,00 | 0 | 4,1 | 27,77 | 90  | 0 | 0 | 108 | 10 | 1 | 1 | 0 | 0 | 0 | 0 | 0 | 0 | 0 | 0 | 0 |
| 86 | 0 | 0,00 | 0 | 5,2 | 33,30 | 104 | 0 | 0 | 113 | 11 | 1 | 1 | 1 | 0 | 0 | 0 | 0 | 0 | 0 | 0 | 3 |
| 72 | 1 | 0,00 | 0 | 5,1 | 25,35 | 89  | 0 | 0 | 91  | 8  | 1 | 0 | 1 | 0 | 0 | 0 | 1 | 1 | 0 | 0 | 0 |
| 76 | 1 | 0,00 | 0 | 5,5 | 27,82 | 98  | 0 | 0 | 158 | 6  | 1 | 0 | 1 | 0 | 0 | 0 | 1 | 0 | 0 | 0 | 0 |
| 80 | 1 | 0,00 | 0 | 4,7 | 24,07 | 105 | 0 | 0 | 82  | 4  | 1 | 0 | 0 | 0 | 0 | 0 | 0 | 0 | 0 | 0 | 1 |
| 91 | 1 | 0,00 | 0 | 4,9 | 27,17 | 102 | 0 | 0 | 100 | 0  | 1 | 0 | 0 | 0 | 0 | 0 | 0 | 0 | 0 | 0 | 0 |
| 62 | 0 | 0,00 | 0 | 4,8 | 17,98 | 78  | 0 | 0 | 110 | 6  | 1 | 0 | 0 | 0 | 0 | 0 | 0 | 1 | 0 | 0 | 0 |

|    |   |      |   |     |       |     |   |   |     |    |   |   |   |   |   |   |   |   |   |   |
|----|---|------|---|-----|-------|-----|---|---|-----|----|---|---|---|---|---|---|---|---|---|---|
| 79 | 1 | 0,00 | 0 | 4,6 | 22,72 |     | 0 | 0 | 121 | 0  | 1 | 1 | 0 | 0 | 1 | 0 | 0 | 0 | 0 | 0 |
| 77 | 0 | 0,00 | 0 | 4,4 | 25,71 | 105 | 0 | 0 | 118 | 10 | 1 | 1 | 0 | 0 | 0 | 0 | 0 | 0 | 0 | 0 |
| 60 | 1 | 0,00 | 0 | 5,1 | 22,31 | 94  | 0 | 0 | 91  | 0  | 1 | 1 | 1 | 0 | 0 | 0 | 1 | 1 | 0 | 0 |
| 73 | 0 | 0,00 | 0 | 5,2 | 24,97 | 83  | 0 | 0 | 90  | 8  | 1 | 1 | 1 | 0 | 0 | 0 | 0 | 1 | 0 | 0 |
| 75 | 0 | 0,00 | 0 | 5,2 | 25,39 | 84  | 0 | 0 | 110 | 5  | 1 | 1 | 0 | 0 | 0 | 0 | 0 | 0 | 0 | 0 |
| 66 | 1 | 0,00 | 0 | 5,2 |       |     | 0 | 0 | 101 | 21 | 1 | 0 | 1 | 0 | 0 | 0 | 0 | 1 | 0 | 0 |
| 64 | 1 | 0,00 | 0 | 5,5 | 27,44 |     | 0 | 0 | 127 | 14 | 1 | 1 | 1 | 0 | 1 | 0 | 0 | 0 | 0 | 0 |
| 80 | 0 | 0,00 | 0 | 5,4 | 26,67 | 103 | 0 | 0 | 97  | 5  | 1 | 0 | 1 | 0 | 1 | 0 | 0 | 0 | 0 | 2 |
| 90 | 0 | 0,00 | 0 | 5,0 |       |     | 0 | 0 | 99  | 5  | 1 | 0 | 0 | 1 | 0 | 0 | 0 | 0 | 0 | 0 |
| 86 | 1 | 0,00 | 0 | 5,4 | 25,26 | 83  | 0 | 0 | 82  | 7  | 1 | 1 | 1 | 0 | 0 | 0 | 1 | 0 | 0 | 0 |
| 73 | 1 | 0,00 | 0 | 5,4 | 28,03 | 99  | 0 | 0 | 101 | 1  | 1 | 1 | 1 | 0 | 0 | 0 | 1 | 1 | 0 | 0 |
| 48 | 1 | 0,00 | 0 | 5,3 | 29,63 | 102 | 0 | 0 | 225 | 19 | 1 | 1 | 1 | 0 | 0 | 0 | 1 | 1 | 0 | 0 |
| 82 | 1 | 0,00 | 0 | 5,4 | 31,14 | 120 | 0 | 0 | 115 | 7  | 1 | 1 | 1 | 0 | 1 | 0 | 1 | 0 | 0 | 3 |
| 78 | 1 | 0,00 | 0 | 5,3 | 26,08 |     | 0 | 0 | 87  | 3  | 1 | 0 | 0 | 0 | 0 | 0 | 0 | 0 | 0 | 0 |
| 89 | 0 | 0,00 | 0 | 5,3 | 24,24 | 102 | 0 | 0 | 115 | 6  | 1 | 1 | 0 | 0 | 0 | 0 | 0 | 0 | 0 | 2 |
| 67 | 1 | 0,00 | 0 | 5,6 | 21,64 | 90  | 0 | 0 | 142 | 1  | 1 | 0 | 0 | 0 | 0 | 0 | 0 | 1 | 0 | 0 |
| 68 | 0 | 0,00 | 0 | 5,6 | 28,44 | 99  | 0 | 0 | 123 | 2  | 1 | 0 | 1 | 0 | 0 | 0 | 0 | 1 | 0 | 0 |
| 87 | 0 | 0,00 | 0 | 5,3 | 29,30 | 108 | 0 | 0 | 160 | 17 | 1 | 1 | 0 | 0 | 0 | 0 | 1 | 0 | 0 | 3 |
| 65 | 1 | 0,00 | 0 | 5,4 | 21,63 | 80  | 0 | 0 | 127 | 8  | 1 | 0 | 0 | 0 | 0 | 0 | 1 | 1 | 0 | 2 |
| 62 | 1 | 0,00 | 0 | 5,5 | 21,46 |     | 0 | 0 | 228 | 6  | 1 | 1 | 1 | 1 | 0 | 0 | 1 | 1 | 0 | 0 |
| 50 | 1 | 0,00 | 0 | 5,6 | 30,42 | 110 | 0 | 0 | 119 | 1  | 1 | 1 | 1 | 0 | 0 | 0 | 1 | 1 | 0 | 0 |
| 75 | 1 | 0,00 | 0 | 5,3 | 31,14 | 102 | 0 | 0 | 87  | 10 | 1 | 1 | 0 | 0 | 0 | 0 | 1 | 1 | 0 | 3 |
| 60 | 0 | 0,00 | 0 | 5,4 | 20,78 | 69  | 0 | 0 | 104 | 2  | 1 | 1 | 0 | 0 | 0 | 0 | 0 | 1 | 0 | 0 |
| 62 | 1 | 0,00 | 0 | 5,6 | 36,36 | 86  | 0 | 0 | 80  | 4  | 1 | 0 | 0 | 0 | 0 | 0 | 0 | 1 | 0 | 0 |
| 52 | 1 | 0,00 | 0 | 5,6 | 25,51 | 127 | 0 | 0 | 166 | 3  | 1 | 1 | 0 | 0 | 0 | 0 | 1 | 1 | 0 | 0 |
| 80 | 1 | 1,00 | 1 | 5,6 | 24,31 | 90  | 0 | 0 | 108 | 6  | 1 | 0 | 0 | 0 | 0 | 0 | 0 | 0 | 0 | 0 |
| 64 | 1 | 1,00 | 1 | 5,8 | 29,73 | 115 | 0 | 0 | 106 | 1  | 1 | 1 | 1 | 1 | 1 | 0 | 1 | 1 | 0 | 0 |
| 64 | 1 | 1,00 | 1 | 5,3 | 33,12 | 115 | 0 | 0 | 89  | 0  | 1 | 1 | 0 | 0 | 0 | 0 | 0 | 0 | 0 | 0 |
| 74 | 0 | 1,00 | 1 | 5,3 | 23,51 | 104 | 0 | 0 | 86  | 4  | 1 | 1 | 1 | 0 | 0 | 0 | 0 | 0 | 0 | 0 |
| 70 | 0 | 1,00 | 1 | 5,4 | 26,95 | 114 | 0 | 0 | 101 | 10 | 1 | 1 | 0 | 0 | 0 | 0 | 0 | 1 | 0 | 0 |
| 88 | 0 | 1,00 | 1 | 5,4 | 23,73 | 88  | 0 | 0 | 107 | 5  | 1 | 1 | 0 | 0 | 0 | 0 | 0 | 0 | 0 | 0 |
| 58 | 1 | 1,00 | 1 | 5,7 | 25,25 | 106 | 0 | 0 | 141 | 22 | 1 | 1 | 0 | 0 | 0 | 0 | 1 | 1 | 0 | 0 |
| 81 | 1 | 1,00 | 1 | 6,3 |       |     | 0 | 0 | 70  | 4  | 1 | 1 | 0 | 0 | 0 | 0 | 0 | 1 | 0 | 0 |
| 60 | 0 | 1,00 | 1 | 6,1 | 35,16 | 122 | 0 | 0 | 137 | 7  | 1 | 1 | 1 | 0 | 0 | 0 | 0 | 1 | 0 | 0 |
| 59 | 1 | 1,00 | 1 | 6,4 | 29,88 | 114 | 0 | 0 | 90  | 0  | 1 | 0 | 1 | 1 | 1 | 0 | 1 | 1 | 0 | 0 |
| 76 | 1 | 1,00 | 1 | 5,8 | 26,57 | 102 | 0 | 0 | 93  | 20 | 1 | 1 | 1 | 0 | 0 | 0 | 1 | 1 | 0 | 0 |
| 60 | 1 | 1,00 | 1 | 6,4 | 38,51 | 117 | 0 | 0 | 120 | 7  | 1 | 1 | 1 | 0 | 1 | 0 | 0 | 0 | 0 | 0 |



|    |   |      |   |     |       |     |   |   |     |    |   |   |   |   |   |   |   |   |   |   |
|----|---|------|---|-----|-------|-----|---|---|-----|----|---|---|---|---|---|---|---|---|---|---|
| 79 | 1 | 0,00 | 2 | 6,8 | 21,13 | 96  | 1 | 1 | 127 | 4  | 1 | 1 | 1 | 0 | 1 | 0 | 0 | 0 | 0 | 0 |
| 64 | 0 | 0,00 | 0 | 5,1 | 24,97 | 90  | 0 | 0 | 96  | 4  | 2 | 0 | 0 | 0 | 0 | 0 | 0 | 1 | 0 | 0 |
| 78 | 1 | 0,00 | 0 | 5,3 | 24,34 | 100 | 0 | 0 | 88  | 2  | 2 | 1 | 0 | 0 | 0 | 0 | 0 | 0 | 0 | 0 |
| 84 | 0 | 0,00 | 0 | 5,2 | 26,56 | 93  | 0 | 0 | 91  | 4  | 2 | 0 | 0 | 0 | 0 | 0 | 0 | 0 | 0 | 0 |
| 80 | 0 | 0,00 | 0 | 5,4 | 22,39 | 98  | 0 | 0 | 103 | 3  | 2 | 1 | 0 | 0 | 0 | 0 | 0 | 1 | 0 | 3 |
| 54 | 0 | 0,00 | 0 | 4,7 | 29,67 | 100 | 0 | 0 | 118 | 3  | 2 | 1 | 1 | 0 | 0 | 0 | 0 | 0 | 0 | 2 |
| 53 | 1 | 0,00 | 0 | 5,1 | 21,51 | 92  | 0 | 0 | 90  | 7  | 2 | 0 | 1 | 0 | 0 | 0 | 0 | 1 | 0 | 0 |
| 91 | 1 | 0,00 | 0 | 4,4 | 28,06 | 99  | 0 | 0 | 103 | 6  | 2 | 0 | 0 | 0 | 0 | 0 | 0 | 1 | 0 | 0 |
| 71 | 1 | 0,00 | 0 | 4,6 | 39,06 | 140 | 0 | 0 | 114 | 2  | 2 | 1 | 1 | 0 | 0 | 0 | 0 | 0 | 0 | 0 |
| 89 | 0 | 0,00 | 0 | 4,9 | 24,97 | 100 | 0 | 0 | 112 | 10 | 2 | 1 | 0 | 0 | 0 | 0 | 0 | 0 | 0 | 0 |
| 61 | 1 | 0,00 | 0 | 4,7 | 20,31 | 71  | 0 | 0 | 94  | 6  | 2 | 1 | 0 | 0 | 0 | 0 | 0 | 1 | 0 | 0 |
| 71 | 1 | 0,00 | 0 | 4,2 | 23,51 | 90  | 0 | 0 | 103 | 3  | 2 | 1 | 0 | 0 | 0 | 0 | 1 | 1 | 0 | 2 |
| 59 | 0 | 0,00 | 0 | 4,7 | 31,14 | 104 | 0 | 0 | 97  | 10 | 2 | 0 | 1 | 0 | 0 | 0 | 0 | 0 | 0 | 0 |
| 74 | 0 | 0,00 | 0 | 5,0 | 31,11 | 82  | 0 | 0 | 122 | 3  | 2 | 0 | 0 | 0 | 0 | 0 | 0 | 0 | 0 | 0 |
| 53 | 1 | 0,00 | 0 | 4,4 | 30,84 | 102 | 0 | 0 | 79  | 2  | 2 | 0 | 1 | 0 | 0 | 0 | 0 | 0 | 0 | 0 |
| 63 | 1 | 0,00 | 0 | 5,1 | 22,32 | 87  | 0 | 0 | 120 | 4  | 2 | 0 | 0 | 0 | 0 | 0 | 1 | 1 | 0 | 0 |
| 75 | 0 | 0,00 | 0 | 5,1 | 24,22 | 82  | 0 | 0 | 98  | 8  | 2 | 1 | 0 | 0 | 0 | 0 | 0 | 0 | 0 | 0 |
| 72 | 0 | 0,00 | 0 | 5,0 | 30,36 | 104 | 0 | 0 | 101 | 3  | 2 | 1 | 0 | 0 | 0 | 0 | 0 | 0 | 0 | 0 |
| 71 | 1 | 0,00 | 0 | 4,8 | 27,04 | 105 | 0 | 0 | 106 | 4  | 2 | 0 | 0 | 0 | 0 | 0 | 1 | 1 | 0 | 0 |
| 92 | 1 | 0,00 | 0 | 4,6 | 24,21 | 82  | 0 | 0 | 88  | 4  | 2 | 1 | 1 | 0 | 0 | 0 | 1 | 1 | 0 | 2 |
| 58 | 1 | 0,00 | 0 | 4,7 | 29,64 | 96  | 0 | 0 | 103 | 2  | 2 | 0 | 0 | 0 | 0 | 0 | 0 | 0 | 0 | 0 |
| 62 | 0 | 0,00 | 0 | 5,3 | 26,42 | 105 | 0 | 0 | 147 | 4  | 2 | 1 | 0 | 0 | 0 | 0 | 0 | 0 | 0 | 0 |
| 54 | 1 | 0,00 | 0 | 4,7 | 27,45 | 89  | 0 | 0 | 90  | 3  | 2 | 0 | 1 | 0 | 0 | 0 | 1 | 0 | 0 | 1 |
| 87 | 0 | 0,00 | 0 | 4,3 | 25,30 | 90  | 0 | 0 | 80  | 4  | 2 | 1 | 0 | 0 | 1 | 0 | 0 | 0 | 0 | 1 |
| 76 | 1 | 0,00 | 0 | 5,0 | 27,64 | 106 | 0 | 0 | 99  | 6  | 2 | 0 | 1 | 0 | 1 | 0 | 1 | 0 | 0 | 0 |
| 57 | 1 | 0,00 | 0 | 4,5 | 30,45 | 110 | 0 | 0 | 82  | 0  | 2 | 1 | 1 | 0 | 0 | 0 | 0 | 0 | 0 | 0 |
| 68 | 1 | 0,00 | 0 | 5,2 | 29,74 | 103 | 0 | 0 | 145 | 5  | 2 | 1 | 1 | 0 | 0 | 0 | 1 | 0 | 0 | 0 |
| 62 | 1 | 0,00 | 0 | 5,1 | 35,16 | 119 | 0 | 0 | 88  | 3  | 2 | 1 | 1 | 0 | 1 | 0 | 0 | 0 | 0 | 0 |
| 43 | 0 | 0,00 | 0 | 5,0 | 21,62 | 73  | 0 | 0 | 135 | 3  | 2 | 0 | 0 | 0 | 0 | 0 | 0 | 1 | 0 | 0 |
| 41 | 1 | 0,00 | 0 | 4,9 | 24,51 | 92  | 0 | 0 | 149 | 8  | 2 | 0 | 0 | 0 | 0 | 0 | 0 | 0 | 0 | 0 |
| 72 | 1 | 0,00 | 0 | 4,4 | 23,95 | 102 | 0 | 0 | 102 | 15 | 2 | 0 | 0 | 0 | 0 | 0 | 0 | 1 | 0 | 0 |
| 77 | 1 | 0,00 | 0 | 5,5 | 27,92 | 96  | 0 | 0 | 64  | 1  | 2 | 0 | 0 | 1 | 0 | 0 | 0 | 0 | 0 | 0 |
| 56 | 1 | 0,00 | 0 | 4,8 | 23,03 | 91  | 0 | 0 | 100 | 12 | 2 | 0 | 0 | 0 | 0 | 0 | 1 | 1 | 0 | 0 |
| 71 | 0 | 0,00 | 0 | 5,5 | 32,00 | 95  | 0 | 0 | 205 | 7  | 2 | 0 | 1 | 0 | 0 | 0 | 0 | 0 | 0 | 0 |
| 81 | 1 | 0,00 | 0 | 4,9 | 25,54 | 88  | 0 | 0 | 94  | 6  | 2 | 0 | 1 | 0 | 0 | 0 | 0 | 1 | 0 | 3 |
| 75 | 1 | 0,00 | 0 | 4,9 | 22,53 | 102 | 0 | 0 | 103 | 7  | 2 | 0 | 0 | 0 | 0 | 0 | 0 | 0 | 0 | 3 |
| 80 | 0 | 0,00 | 0 | 5,2 | 26,64 | 93  | 0 | 0 | 118 | 1  | 2 | 1 | 1 | 0 | 0 | 0 | 0 | 0 | 0 | 0 |

|    |   |      |   |     |       |     |   |   |     |    |   |   |   |   |   |   |   |   |   |   |
|----|---|------|---|-----|-------|-----|---|---|-----|----|---|---|---|---|---|---|---|---|---|---|
| 86 | 0 | 0,00 | 0 | 4,7 | 21,64 | 67  | 0 | 0 | 89  | 7  | 2 | 1 | 0 | 0 | 0 | 0 | 0 | 0 | 0 | 3 |
| 49 | 1 | 0,00 | 0 | 4,5 |       |     | 0 | 0 | 114 | 1  | 2 | 0 | 1 | 0 | 0 | 0 | 0 | 1 | 0 | 0 |
| 63 | 1 | 0,00 | 0 | 5,3 | 26,18 | 86  | 0 | 0 | 180 | 3  | 2 | 1 | 1 | 1 | 0 | 0 | 1 | 1 | 0 | 0 |
| 71 | 1 | 0,00 | 0 | 4,3 | 21,71 | 86  | 0 | 0 | 117 | 0  | 2 | 1 | 1 | 0 | 0 | 0 | 0 | 0 | 0 | 0 |
| 49 | 0 | 0,00 | 0 | 4,8 | 33,06 | 73  | 0 | 0 | 93  | 3  | 2 | 1 | 0 | 0 | 0 | 0 | 0 | 0 | 0 | 0 |
| 74 | 1 | 0,00 | 0 | 4,7 | 24,80 | 95  | 0 | 0 | 100 | 2  | 2 | 1 | 1 | 1 | 1 | 0 | 1 | 1 | 0 | 1 |
| 62 | 0 | 0,00 | 0 | 5,6 | 27,18 | 88  | 0 | 0 | 115 | 2  | 2 | 1 | 1 | 0 | 0 | 0 | 0 | 0 | 0 | 0 |
| 77 | 0 | 0,00 | 0 | 5,4 | 30,83 | 86  | 0 | 0 | 171 | 4  | 2 | 1 | 0 | 0 | 0 | 0 | 0 | 0 | 0 | 0 |
| 88 | 0 | 0,00 | 0 | 5,0 | 25,39 | 106 | 0 | 0 | 94  | 3  | 2 | 0 | 0 | 0 | 0 | 0 | 0 | 0 | 0 | 0 |
| 82 | 1 | 0,00 | 0 | 4,8 | 24,97 | 90  | 0 | 0 | 91  | 3  | 2 | 1 | 1 | 0 | 1 | 0 | 0 | 0 | 0 | 3 |
| 51 | 1 | 0,00 | 0 | 4,2 | 23,38 | 100 | 0 | 0 | 94  | 1  | 2 | 1 | 1 | 0 | 0 | 0 | 0 | 0 | 0 | 0 |
| 82 | 1 | 0,00 | 0 | 5,5 | 28,69 | 85  | 0 | 0 | 78  | 5  | 2 | 0 | 1 | 0 | 0 | 0 | 0 | 0 | 0 | 1 |
| 76 | 1 | 0,00 | 0 | 4,4 | 25,23 | 100 | 0 | 0 | 98  | 4  | 2 | 1 | 0 | 0 | 0 | 0 | 1 | 0 | 0 | 0 |
| 66 | 1 | 0,00 | 0 | 4,9 | 28,36 | 115 | 0 | 0 | 108 | 0  | 2 | 1 | 0 | 0 | 0 | 0 | 1 | 1 | 0 | 0 |
| 71 | 0 | 0,00 | 0 | 5,0 | 27,64 | 105 | 0 | 0 | 96  | 5  | 2 | 1 | 0 | 0 | 0 | 0 | 0 | 0 | 0 | 1 |
| 65 | 1 | 0,00 | 0 | 5,0 | 24,22 | 84  | 0 | 0 | 95  | 5  | 2 | 0 | 0 | 0 | 0 | 0 | 0 | 0 | 0 | 3 |
| 54 | 1 | 0,00 | 0 | 4,8 |       |     | 0 | 0 | 72  | 4  | 2 | 1 | 0 | 0 | 0 | 0 | 0 | 1 | 0 | 0 |
| 79 | 1 | 0,00 | 0 | 5,0 | 26,95 | 80  | 0 | 0 | 79  | 2  | 2 | 1 | 0 | 0 | 0 | 0 | 0 | 0 | 0 | 0 |
| 79 | 1 | 0,00 | 0 | 5,2 | 26,37 | 87  | 0 | 0 | 103 | 4  | 2 | 0 | 1 | 0 | 0 | 0 | 1 | 0 | 0 | 0 |
| 69 | 1 | 0,00 | 0 | 4,7 | 34,25 |     | 0 | 0 | 111 | 3  | 2 | 1 | 0 | 0 | 0 | 0 | 1 | 1 | 0 | 0 |
| 59 | 0 | 0,00 | 0 | 5,2 | 27,56 | 86  | 0 | 0 | 99  | 2  | 2 | 0 | 0 | 0 | 0 | 0 | 0 | 0 | 0 | 0 |
| 77 | 1 | 0,00 | 0 | 5,2 | 29,05 |     | 0 | 0 | 91  | 3  | 2 | 1 | 0 | 1 | 0 | 0 | 1 | 0 | 0 | 0 |
| 66 | 0 | 0,00 | 0 | 5,5 | 28,04 |     | 0 | 0 | 116 | 1  | 2 | 1 | 1 | 0 | 0 | 0 | 0 | 0 | 0 | 0 |
| 52 | 0 | 0,00 | 0 | 5,3 |       |     | 0 | 0 | 112 | 6  | 2 | 1 | 1 | 0 | 0 | 0 | 1 | 1 | 0 | 0 |
| 65 | 1 | 0,00 | 0 | 4,9 | 34,77 | 110 | 0 | 0 | 95  | 12 | 2 | 1 | 0 | 0 | 1 | 0 | 0 | 0 | 0 | 2 |
| 70 | 1 | 0,00 | 0 | 5,5 | 22,20 | 97  | 0 | 0 | 131 | 2  | 2 | 1 | 0 | 0 | 0 | 0 | 1 | 0 | 0 | 0 |
| 55 | 1 | 0,00 | 0 | 5,4 | 29,38 |     | 0 | 0 | 184 | 4  | 2 | 1 | 0 | 0 | 0 | 0 | 1 | 1 | 0 | 0 |
| 84 | 0 | 0,00 | 0 | 5,4 | 25,39 | 102 | 0 | 0 | 106 | 9  | 2 | 0 | 1 | 0 | 0 | 0 | 0 | 0 | 0 | 0 |
| 51 | 1 | 0,00 | 0 | 4,7 |       |     | 0 | 0 | 87  | 1  | 2 | 1 | 0 | 0 | 0 | 0 |   | 1 | 0 | 0 |
| 55 | 1 | 0,00 | 0 | 5,2 | 31,12 | 106 | 0 | 0 | 101 | 2  | 2 | 1 | 1 | 0 | 0 | 0 | 1 | 1 | 0 | 0 |
| 75 | 1 | 0,00 | 0 | 5,5 | 21,45 |     | 0 | 0 | 107 | 3  | 2 | 0 | 1 | 1 | 0 | 0 | 0 | 1 | 0 | 1 |
| 73 | 1 | 0,00 | 0 | 5,1 | 35,16 | 132 | 0 | 0 | 119 | 6  | 2 | 1 | 1 | 0 | 1 | 0 | 0 | 0 | 0 | 3 |
| 81 | 1 | 0,00 | 0 | 5,6 | 29,72 | 117 | 0 | 0 | 100 | 5  | 2 | 0 | 1 | 0 | 0 | 0 | 0 | 1 | 0 | 0 |
| 76 | 1 | 0,00 | 0 | 5,6 | 28,13 | 99  | 0 | 0 | 150 | 2  | 2 | 1 | 0 | 0 | 0 | 0 | 0 | 0 | 0 | 0 |
| 30 | 1 | 0,00 | 0 | 5,4 | 27,77 | 124 | 0 | 0 | 100 | 6  | 2 | 0 | 1 | 0 | 0 | 0 | 0 | 0 | 0 | 0 |
| 75 | 1 | 0,00 | 0 | 5,4 | 31,22 |     | 0 | 0 | 82  | 6  | 2 | 1 | 0 | 0 | 0 | 0 | 1 | 1 | 0 | 2 |
| 58 | 0 | 0,00 | 0 | 5,1 | 24,89 | 85  | 0 | 0 | 93  | 7  | 2 | 1 | 0 | 0 | 0 | 0 | 0 | 0 | 0 | 2 |

|    |   |      |   |     |       |     |   |   |     |    |   |   |   |   |   |   |   |   |   |   |
|----|---|------|---|-----|-------|-----|---|---|-----|----|---|---|---|---|---|---|---|---|---|---|
| 64 | 1 | 0,00 | 0 | 5,6 | 23,85 |     | 0 | 0 | 103 | 7  | 2 | 1 | 1 | 0 | 0 | 0 | 0 | 0 | 0 | 0 |
| 63 | 0 | 0,00 | 0 | 5,6 | 36,03 |     | 0 | 0 | 96  | 3  | 2 | 1 | 1 | 1 | 0 | 0 | 0 | 0 | 0 | 1 |
| 73 | 0 | 0,00 | 0 | 5,6 | 30,80 | 111 | 0 | 0 | 104 | 5  | 2 | 1 | 1 | 0 | 0 | 0 | 0 | 0 | 0 | 0 |
| 55 | 1 | 0,00 | 0 | 5,4 | 24,80 |     | 0 | 0 | 98  | 4  | 2 | 0 | 0 | 0 | 0 | 0 | 1 | 0 | 0 | 0 |
| 81 | 1 | 0,00 | 0 | 5,5 | 26,23 | 115 | 0 | 0 | 94  | 1  | 2 | 1 | 1 | 0 | 0 | 0 | 1 | 0 | 0 | 2 |
| 66 | 0 | 0,00 | 0 | 5,5 | 27,83 |     | 0 | 0 | 90  | 12 | 2 | 1 | 0 | 0 | 0 | 0 | 0 | 0 | 0 | 3 |
| 79 | 1 | 0,00 | 0 | 5,0 | 24,61 | 100 | 0 | 0 | 92  | 3  | 2 | 1 | 1 | 0 | 0 | 0 | 0 | 0 | 0 | 1 |
| 75 | 0 | 0,00 | 0 | 5,1 | 26,04 |     | 0 | 0 | 96  | 6  | 2 | 1 | 1 | 0 | 0 | 0 | 0 | 0 | 0 | 0 |
| 65 | 1 | 0,00 | 0 | 5,4 | 27,39 | 89  | 0 | 0 | 121 | 0  | 2 | 1 | 1 | 0 | 0 | 0 | 1 | 1 | 0 | 0 |
| 86 | 0 | 0,00 | 0 | 5,3 | 27,06 | 125 | 0 | 0 | 86  | 11 | 2 | 1 | 1 | 0 | 0 | 0 | 0 | 0 | 0 | 0 |
| 83 | 0 | 0,00 | 0 | 5,4 | 32,00 | 110 | 0 | 0 | 103 | 5  | 2 | 1 | 0 | 0 | 0 | 1 | 0 | 0 | 0 | 2 |
| 55 | 1 | 0,00 | 0 | 5,5 | 27,10 | 87  | 0 | 0 | 124 | 5  | 2 | 0 | 1 | 0 | 0 | 0 | 0 | 1 | 0 | 0 |
| 51 | 1 | 0,00 | 0 | 4,6 | 23,44 | 104 | 0 | 0 | 182 | 4  | 2 | 0 | 0 | 0 | 1 | 0 | 1 | 1 | 0 | 0 |
| 58 | 0 | 1,00 | 1 | 5,9 | 25,39 | 100 | 0 | 0 | 151 | 4  | 2 | 1 | 0 | 0 | 0 | 0 | 0 | 0 | 0 | 0 |
| 71 | 1 | 1,00 | 1 | 5,4 | 29,38 | 107 | 0 | 0 | 78  | 3  | 2 | 1 | 0 | 1 | 0 | 0 | 0 | 0 | 0 | 0 |
| 73 | 1 | 1,00 | 1 | 5,4 | 22,48 | 87  | 0 | 0 | 108 | 5  | 2 | 1 | 0 | 0 | 0 | 0 | 0 | 0 | 0 | 0 |
| 78 | 0 | 1,00 | 1 | 5,4 | 31,64 | 119 | 0 | 0 | 95  | 6  | 2 | 1 | 0 | 0 | 0 | 0 | 0 | 0 | 0 | 0 |
| 81 | 1 | 1,00 | 1 | 5,7 | 29,34 | 113 | 0 | 0 | 113 | 1  | 2 | 0 | 1 | 1 | 0 | 0 | 0 | 0 | 0 | 2 |
| 82 | 0 | 1,00 | 1 | 5,4 | 26,95 | 100 | 0 | 0 | 104 | 3  | 2 | 1 | 0 | 0 | 0 | 0 | 0 | 0 | 0 | 0 |
| 80 | 0 | 1,00 | 1 | 5,8 | 26,38 | 83  | 0 | 0 | 97  | 3  | 2 | 1 | 0 | 0 | 0 | 0 | 0 | 0 | 0 | 0 |
| 46 | 1 | 1,00 | 1 | 5,9 | 27,04 | 100 | 0 | 0 | 232 | 0  | 2 | 0 | 0 | 0 | 0 | 0 | 0 | 0 | 0 | 0 |
| 60 | 1 | 1,00 | 1 | 5,7 | 31,14 | 115 | 0 | 0 | 81  | 1  | 2 | 0 | 1 | 1 | 1 | 0 | 1 | 1 | 0 | 0 |
| 64 | 1 | 1,00 | 1 | 5,6 | 22,60 | 80  | 0 | 0 | 101 | 2  | 2 | 0 | 0 | 0 | 0 | 0 | 0 | 0 | 0 | 0 |
| 67 | 1 | 1,00 | 1 | 6,0 |       |     | 0 | 0 | 131 | 1  | 2 | 1 | 0 | 0 | 0 | 0 | 1 | 0 | 0 | 0 |
| 51 | 0 | 1,00 | 1 | 5,3 | 31,11 | 98  | 0 | 0 | 110 | 4  | 2 | 1 | 0 | 0 | 0 | 0 | 0 | 1 | 0 | 0 |
| 65 | 0 | 1,00 | 1 | 5,8 | 27,70 | 102 | 0 | 0 | 129 | 1  | 2 | 1 | 0 | 0 | 0 | 0 | 0 | 0 | 0 | 0 |
| 59 | 1 | 1,00 | 1 | 5,5 |       | 101 | 0 | 0 | 130 | 2  | 2 | 0 | 0 | 0 | 0 | 0 | 1 | 1 | 0 | 0 |
| 82 | 0 | 1,00 | 1 | 5,9 |       |     | 0 | 0 | 99  | 4  | 2 | 1 | 0 | 0 | 0 | 0 | 0 | 0 | 0 | 0 |
| 46 | 1 | 1,00 | 1 | 6,3 | 23,67 |     | 0 | 0 | 119 | 3  | 2 | 1 | 0 | 0 | 0 | 0 | 0 | 1 | 0 | 0 |
| 65 | 1 | 1,00 | 1 | 6,3 | 29,24 | 100 | 0 | 0 | 103 | 0  | 2 | 0 | 1 | 0 | 0 | 0 | 0 | 1 | 0 | 0 |
| 65 | 1 | 1,00 | 1 | 5,8 |       |     | 0 | 0 | 147 | 10 | 2 | 1 | 1 | 0 | 0 | 0 | 0 | 1 | 0 | 0 |
| 49 | 1 | 1,00 | 1 | 5,8 | 25,86 |     | 0 | 0 | 126 | 2  | 2 | 0 | 0 | 0 | 0 | 0 | 0 | 1 | 0 | 0 |
| 73 | 1 | 1,00 | 1 | 5,9 | 31,10 | 107 | 0 | 0 | 113 | 3  | 2 | 1 | 1 | 0 | 0 | 0 | 1 | 0 | 0 | 0 |
| 49 | 1 | 1,00 | 1 | 6,2 | 28,60 |     | 0 | 0 | 86  | 1  | 2 | 1 | 1 | 0 | 0 | 0 | 1 | 1 | 0 | 0 |
| 84 | 1 | 1,00 | 1 | 6,2 | 24,57 | 93  | 0 | 0 | 132 | 2  | 2 | 1 | 0 | 1 | 0 | 0 | 0 | 0 | 0 | 3 |
| 68 | 1 | 1,00 | 1 | 5,8 | 26,73 | 103 | 0 | 0 | 92  | 1  | 2 | 0 | 1 | 0 | 0 | 0 | 0 | 0 | 0 | 0 |
| 80 | 0 | 1,00 | 1 | 6,2 | 24,20 | 87  | 0 | 0 | 122 | 2  | 2 | 1 | 1 | 0 | 0 | 0 | 0 | 0 | 0 | 0 |



|    |   |      |   |     |       |     |   |   |     |   |   |   |   |   |   |   |   |   |   |   |
|----|---|------|---|-----|-------|-----|---|---|-----|---|---|---|---|---|---|---|---|---|---|---|
| 81 | 1 | 1,00 | 1 | 5,8 | 21,45 |     | 0 | 0 | 101 | 3 | 2 | 1 | 0 | 0 | 0 | 0 | 0 | 0 | 0 | 0 |
| 88 | 0 | 1,00 | 1 | 5,7 |       |     | 0 | 0 | 124 | 3 | 2 | 1 | 1 | 0 | 0 | 0 | 0 | 0 | 0 | 0 |
| 90 | 0 | 1,00 | 1 | 6,0 | 24,98 | 83  | 0 | 0 | 122 | 3 | 2 | 1 | 0 | 0 | 0 | 0 | 0 | 0 | 0 | 2 |
| 78 | 0 | 1,00 | 1 | 6,1 | 29,38 | 112 | 0 | 0 | 110 | 3 | 2 | 1 | 1 | 0 | 0 | 0 | 1 | 0 | 0 | 0 |
| 79 | 0 | 1,00 | 1 | 5,9 | 22,27 | 97  | 0 | 0 | 125 | 3 | 2 | 1 | 1 | 0 | 0 | 0 | 0 | 0 | 0 | 1 |
| 77 | 1 | 1,00 | 1 | 5,9 | 30,85 | 108 | 0 | 0 | 99  | 3 | 2 | 0 | 0 | 0 | 0 | 0 | 1 | 0 | 0 | 0 |
| 66 | 1 | 1,00 | 1 | 5,7 | 24,51 |     | 0 | 0 | 94  | 3 | 2 | 1 | 0 | 1 |   | 0 | 1 | 1 | 0 | 0 |
| 86 | 1 | 1,00 | 1 | 6,3 | 27,64 | 102 | 0 | 0 | 180 | 1 | 2 | 1 | 0 | 0 | 1 | 0 | 0 | 0 | 0 | 2 |
| 79 | 0 | 1,00 | 1 | 5,7 | 26,02 | 92  | 0 | 0 | 127 | 3 | 2 | 1 | 1 | 0 | 0 | 0 | 0 | 0 | 0 | 3 |
| 76 | 0 | 1,00 | 1 | 5,7 | 27,34 | 100 | 0 | 0 | 92  | 1 | 2 | 1 | 1 | 0 | 0 | 0 | 0 | 0 | 0 | 0 |
| 60 | 1 | 1,00 | 1 | 5,9 | 30,47 | 101 | 0 | 0 | 101 | 5 | 2 | 0 | 0 | 0 | 0 | 0 | 0 | 1 | 0 | 2 |
| 44 | 0 | 1,00 | 1 | 5,8 | 23,11 | 80  | 0 | 0 | 85  | 1 | 2 | 1 | 0 | 0 | 0 | 0 | 0 | 0 | 0 | 0 |
| 83 | 0 | 1,00 | 1 | 6,3 | 29,52 | 103 | 0 | 0 | 84  | 6 | 2 | 1 | 0 | 0 | 0 | 0 | 0 | 0 | 0 | 0 |
| 68 | 1 | 1,00 | 1 | 5,9 | 37,38 | 122 | 0 | 0 | 107 | 2 | 2 | 1 | 0 | 0 | 0 | 0 | 0 | 0 | 0 | 0 |
| 77 | 0 | 1,00 | 1 | 5,9 | 27,47 | 93  | 0 | 0 | 96  | 9 | 2 | 1 | 1 | 1 | 0 | 0 | 0 | 0 | 0 | 0 |
| 59 | 0 | 1,00 | 1 | 5,8 | 41,09 | 128 | 0 | 0 | 135 | 4 | 2 | 1 | 0 | 0 | 0 | 0 | 1 | 0 | 0 | 2 |
| 78 | 1 | 1,00 | 1 | 6,0 | 21,97 | 101 | 0 | 0 | 118 | 5 | 2 | 0 | 1 | 0 | 0 | 0 | 1 | 1 | 0 | 0 |
| 86 | 1 | 1,00 | 1 | 5,9 | 17,36 |     | 0 | 0 | 112 | 3 | 2 | 1 | 1 | 0 | 0 | 0 | 1 | 0 | 0 | 0 |
| 69 | 1 | 1,00 | 1 | 5,8 | 31,27 |     | 0 | 0 | 112 | 3 | 2 | 1 | 1 | 0 | 0 | 0 | 0 | 0 | 0 | 1 |
| 78 | 0 | 1,00 | 1 | 6,4 | 32,85 | 116 | 0 | 0 | 161 | 1 | 2 | 1 | 1 | 0 | 1 | 0 | 0 | 0 | 0 | 0 |
| 77 | 1 | 1,00 | 1 | 5,7 | 33,06 | 106 | 0 | 0 | 115 | 4 | 2 | 1 | 0 | 0 | 0 | 0 | 0 | 0 | 0 | 0 |
| 83 | 0 | 1,00 | 1 | 5,7 | 26,04 | 92  | 0 | 0 | 101 | 5 | 2 | 1 | 1 | 0 | 0 | 0 | 0 | 0 | 0 | 0 |
| 71 | 1 | 1,00 | 1 | 6,2 | 25,26 | 105 | 0 | 0 | 100 | 4 | 2 | 1 | 1 | 0 | 0 | 0 | 0 | 0 | 0 | 0 |
| 59 | 1 | 1,00 | 1 | 6,2 | 26,17 | 94  | 0 | 0 | 106 | 3 | 2 | 0 | 1 | 0 | 0 | 0 | 1 | 1 | 0 | 0 |
| 55 | 1 | 1,00 | 1 | 5,7 |       |     | 0 | 0 | 135 | 4 | 2 | 1 | 1 | 0 | 0 | 0 | 1 | 0 | 0 | 0 |
| 71 | 0 | 1,00 | 1 | 5,8 | 25,00 | 94  | 0 | 0 | 99  | 2 | 2 | 1 | 1 | 0 | 0 | 0 | 0 | 0 | 0 | 0 |
| 68 | 0 | 1,00 | 1 | 6,1 | 37,89 | 122 | 0 | 0 | 96  | 1 | 2 | 1 | 1 | 0 | 0 | 0 | 0 | 0 | 0 | 1 |
| 81 | 1 | 1,00 | 1 | 5,9 | 25,33 |     | 0 | 0 | 108 | 4 | 2 | 1 | 1 | 0 | 0 | 0 | 0 | 0 | 0 | 0 |
| 78 | 0 | 1,00 | 1 | 5,8 | 31,64 | 155 | 0 | 0 | 106 | 0 | 2 | 1 | 0 | 0 | 0 | 0 | 0 | 0 | 0 | 0 |
| 52 | 0 | 1,00 | 1 | 6,1 | 24,22 | 90  | 0 | 0 | 136 | 3 | 2 | 1 | 1 | 0 | 0 | 0 | 0 | 0 | 0 | 0 |
| 66 | 0 | 1,00 | 1 | 5,7 | 19,88 | 100 | 0 | 0 | 103 | 3 | 2 | 1 | 1 | 0 | 1 | 0 | 0 | 1 | 0 | 0 |
| 54 | 0 | 1,00 | 1 | 5,9 | 31,63 |     | 0 | 0 | 91  | 0 | 2 | 1 | 0 | 0 | 0 | 0 | 0 | 0 | 0 | 0 |
| 55 | 1 | 1,00 | 1 | 5,9 | 31,02 | 110 | 0 | 0 | 115 | 4 | 2 | 1 | 0 | 0 | 0 | 0 | 1 | 1 | 0 | 0 |
| 78 | 1 | 1,00 | 1 | 5,7 | 26,06 |     | 0 | 0 | 111 | 2 | 2 | 1 | 1 | 0 | 0 | 0 | 0 | 0 | 0 | 0 |
| 66 | 1 | 1,00 | 1 | 5,8 | 20,96 | 55  | 0 | 0 | 103 | 1 | 2 | 0 | 0 | 0 | 0 | 0 | 0 | 1 | 0 | 0 |
| 77 | 1 | 1,00 | 1 | 6,2 | 28,73 |     | 0 | 0 | 185 | 1 | 2 | 0 | 1 |   | 0 | 0 | 0 | 1 | 0 | 0 |
| 62 | 0 | 1,00 | 1 | 5,8 | 33,20 | 130 | 0 | 0 | 120 | 4 | 2 | 0 | 1 | 0 | 0 | 0 | 0 | 0 | 0 | 0 |

|    |   |      |   |      |       |     |   |   |     |    |   |   |   |   |   |   |   |   |   |   |
|----|---|------|---|------|-------|-----|---|---|-----|----|---|---|---|---|---|---|---|---|---|---|
| 81 | 0 | 1,00 | 1 | 5,9  | 36,98 | 116 | 0 | 0 | 101 | 2  | 2 | 0 | 0 | 0 | 0 | 0 | 0 | 0 | 0 | 0 |
| 71 | 1 | 2,00 | 2 | 14,8 |       |     | 1 | 1 | 264 | 3  | 2 | 1 | 1 | 0 | 0 | 0 |   | 0 | 0 | 0 |
| 69 | 1 | 2,00 | 2 | 7,8  | 28,33 | 108 | 1 | 1 | 182 | 18 | 2 | 1 | 0 | 0 | 0 | 0 | 0 | 0 | 0 | 1 |
| 65 | 0 | 2,00 | 2 | 6,5  | 29,76 | 103 | 1 | 1 | 163 | 1  | 2 | 1 | 1 | 0 | 0 | 0 | 0 | 0 | 0 | 0 |
| 80 | 1 | 2,00 | 2 | 6,7  | 29,39 | 103 | 1 | 1 | 132 | 14 | 2 | 1 | 0 | 0 | 0 | 0 |   | 0 | 0 | 2 |
| 57 | 1 | 2,00 | 2 | 9,6  | 25,86 | 94  | 1 | 1 | 239 | 5  | 2 | 0 | 0 | 0 | 0 | 0 | 0 | 1 | 0 | 0 |
| 78 | 0 | 2,00 | 2 | 7,1  | 29,13 | 110 | 1 | 1 | 183 | 8  | 2 | 1 | 0 | 0 | 0 | 0 | 0 | 0 | 0 | 0 |
| 57 | 1 | 2,00 | 2 | 7,2  | 24,51 | 82  | 1 | 1 | 106 | 1  | 2 | 0 | 0 | 0 | 0 | 0 | 1 | 1 | 0 | 0 |
| 92 | 1 | 2,00 | 2 | 8,1  |       |     | 1 | 1 | 141 | 7  | 2 | 1 | 1 | 0 | 1 | 0 | 0 | 0 | 0 | 1 |
| 82 | 0 | 2,00 | 2 | 6,5  | 17,04 | 108 | 1 | 1 | 110 | 3  | 2 | 0 | 1 | 0 | 0 | 0 | 0 | 0 | 0 | 3 |
| 78 | 0 | 2,00 | 2 | 6,8  |       |     | 1 | 1 | 98  | 5  | 2 | 1 | 0 | 0 | 0 | 0 | 0 | 0 | 0 | 1 |
| 61 | 0 | 2,00 | 2 | 14,5 | 24,44 | 74  | 1 | 1 | 402 | 3  | 2 | 0 | 0 | 0 | 0 | 0 | 0 | 0 | 0 | 0 |
| 76 | 0 | 2,00 | 2 | 6,8  | 30,82 | 141 | 1 | 1 | 111 | 6  | 2 | 1 | 1 | 0 | 0 | 0 | 0 | 0 | 0 | 3 |
| 67 | 1 | 2,00 | 2 | 7,2  | 33,46 | 105 | 1 | 1 | 147 | 3  | 2 | 1 | 0 | 0 | 0 | 0 | 0 | 0 | 0 | 2 |
| 63 | 0 | 2,00 | 2 | 7,0  | 30,00 | 112 | 1 | 1 | 163 | 3  | 2 | 0 | 0 | 0 | 0 | 0 | 1 | 1 | 0 | 0 |
| 80 | 1 | 2,00 | 2 | 6,7  | 25,61 |     | 1 | 1 | 143 | 2  | 2 | 0 | 1 | 0 | 1 | 0 | 0 | 0 | 0 | 0 |
| 49 | 1 | 2,00 | 2 | 7,2  | 26,04 | 112 | 1 | 1 | 146 | 5  | 2 | 1 | 1 | 0 | 0 | 0 | 1 | 1 | 0 | 0 |
| 74 | 0 | 2,00 | 2 | 7,0  | 27,06 | 98  | 1 | 1 | 145 | 5  | 2 | 1 | 1 | 0 | 0 | 0 | 0 | 0 | 0 | 0 |
| 73 | 1 | 0,00 | 2 | 6,7  |       |     | 1 | 1 | 140 | 5  | 2 | 1 | 0 | 0 | 0 | 0 | 1 | 0 | 0 | 1 |
| 82 | 0 | 0,00 | 2 | 6,6  | 35,11 | 106 | 1 | 1 | 90  | 4  | 2 | 1 | 1 | 0 | 0 | 0 | 0 | 0 | 0 | 0 |
| 69 | 0 | 0,00 | 0 | 5,0  | 32,89 | 105 | 0 | 0 | 114 | 5  | 3 | 1 |   | 0 | 0 | 1 | 1 | 0 | 0 | 0 |
| 82 | 0 | 0,00 | 0 | 5,2  | 23,23 | 90  | 0 | 0 | 149 | 5  | 3 | 1 | 0 | 0 | 1 | 1 | 0 | 0 | 0 | 1 |
| 90 | 0 | 0,00 | 0 | 5,1  | 23,59 | 90  | 0 | 0 | 116 | 20 | 3 | 1 | 0 | 0 | 0 | 1 | 0 | 0 | 0 | 0 |
| 80 | 0 | 0,00 | 0 | 4,8  | 23,78 | 78  | 0 | 0 | 145 | 16 | 3 | 0 | 0 | 0 | 0 | 0 | 0 | 0 | 0 | 0 |
| 82 | 0 | 0,00 | 0 | 5,0  | 23,44 | 107 | 0 | 0 | 95  | 5  | 3 | 0 | 0 | 0 | 0 | 1 | 0 | 0 | 0 | 0 |
| 78 | 0 | 0,00 | 0 | 5,0  | 37,78 | 126 | 0 | 0 | 136 | 15 | 3 | 1 | 1 | 0 | 0 | 1 | 0 | 0 | 0 | 3 |
| 85 | 1 | 0,00 | 0 | 4,3  | 24,22 | 81  | 0 | 0 | 101 | 10 | 3 | 0 | 0 | 0 | 1 | 1 | 0 | 0 | 0 | 0 |
| 77 | 0 | 0,00 | 0 | 4,5  | 22,58 | 85  | 0 | 0 | 108 | 7  | 3 | 1 | 0 | 0 | 0 | 1 | 0 | 0 | 0 | 0 |
| 46 | 0 | 0,00 | 0 | 4,8  | 29,14 | 104 | 0 | 0 | 135 | 13 | 3 | 0 | 0 | 0 | 0 | 0 | 1 | 1 | 0 | 0 |
| 76 | 0 | 0,00 | 0 | 4,8  | 24,77 | 89  | 0 | 0 | 120 | 21 | 3 | 1 | 0 | 0 | 0 | 1 | 0 | 0 | 0 | 0 |
| 71 | 1 | 0,00 | 0 | 4,4  | 26,83 | 102 | 0 | 0 | 95  | 2  | 3 | 1 | 1 | 0 | 1 | 0 | 0 | 0 | 0 | 0 |
| 83 | 0 | 0,00 | 0 | 5,1  | 21,48 | 98  | 0 | 0 | 103 | 3  | 3 | 1 | 0 | 0 | 0 | 1 | 0 | 0 | 0 | 0 |
| 69 | 0 | 0,00 | 0 | 4,8  | 25,61 | 96  | 0 | 0 | 127 | 8  | 3 | 0 | 1 | 0 | 0 | 1 | 0 | 0 | 0 | 0 |
| 79 | 0 | 0,00 | 0 | 4,7  | 27,48 | 107 | 0 | 0 | 100 | 5  | 3 | 1 | 1 | 0 | 1 | 1 | 0 | 0 | 0 | 0 |
| 77 | 0 | 0,00 | 0 | 4,6  | 21,79 | 102 | 0 | 0 | 117 | 13 | 3 | 1 | 0 | 0 | 0 | 1 | 0 | 0 | 0 | 0 |
| 74 | 0 | 0,00 | 0 | 5,0  | 25,81 | 101 | 0 | 0 | 123 | 4  | 3 | 1 | 1 | 0 | 1 | 1 | 0 | 0 | 0 | 0 |
| 86 | 0 | 0,00 | 0 | 5,1  | 24,97 | 83  | 0 | 0 | 95  | 6  | 3 | 1 | 0 | 0 | 0 | 1 | 0 | 0 | 0 | 0 |

|    |   |      |   |     |       |     |   |   |     |    |   |   |   |   |   |   |   |   |   |   |   |
|----|---|------|---|-----|-------|-----|---|---|-----|----|---|---|---|---|---|---|---|---|---|---|---|
| 93 | 0 | 0,00 | 0 | 5,1 | 30,48 | 80  | 0 | 0 | 114 | 8  | 3 | 0 | 0 | 0 | 0 | 0 | 0 | 0 | 0 | 0 |   |
| 80 | 1 | 0,00 | 0 | 5,6 | 23,45 | 101 | 0 | 0 | 101 | 3  | 3 | 1 | 1 | 1 | 0 | 1 | 0 | 0 | 0 | 0 | 0 |
| 82 | 0 | 0,00 | 0 | 5,1 | 18,51 | 82  | 0 | 0 | 111 | 6  | 3 | 1 | 0 | 0 | 1 | 1 | 0 | 0 | 0 | 0 | 0 |
| 88 | 1 | 0,00 | 0 | 5,2 | 21,85 | 100 | 0 | 0 | 127 | 7  | 3 | 0 | 1 | 0 | 0 | 1 | 1 | 0 | 0 | 0 | 0 |
| 68 | 0 | 0,00 | 0 | 4,6 | 23,88 | 89  | 0 | 0 | 100 | 2  | 3 | 1 | 1 | 0 | 0 | 0 | 0 | 0 | 0 | 0 | 1 |
| 84 | 0 | 0,00 | 0 | 4,9 |       | 82  | 0 | 0 | 125 | 4  | 3 | 0 | 0 | 0 | 0 | 1 | 0 | 0 | 0 | 0 | 2 |
| 80 | 0 | 0,00 | 0 | 4,6 | 26,16 | 86  | 0 | 0 | 119 | 9  | 3 | 0 | 0 | 0 | 0 | 1 | 0 | 0 | 0 | 0 | 0 |
| 70 | 0 | 0,00 | 0 | 5,5 | 29,30 | 100 | 0 | 0 | 91  | 3  | 3 | 1 | 1 | 0 | 0 | 1 | 0 | 0 | 0 | 0 | 1 |
| 82 | 0 | 0,00 | 0 | 4,9 | 22,77 | 97  | 0 | 0 | 76  | 5  | 3 | 1 | 0 | 0 | 0 | 1 | 0 | 0 | 0 | 0 | 0 |
| 77 | 1 | 0,00 | 0 | 5,2 | 22,58 | 95  | 0 | 0 | 111 | 25 | 3 | 0 | 0 | 1 | 0 | 1 | 1 | 1 | 0 | 0 | 3 |
| 86 | 1 | 0,00 | 0 | 5,2 | 27,68 | 105 | 0 | 0 | 106 | 4  | 3 | 1 | 1 | 0 | 0 | 1 | 0 | 0 | 0 | 0 | 0 |
| 84 | 0 | 0,00 | 0 | 4,8 | 19,65 | 92  | 0 | 0 | 114 | 3  | 3 | 1 | 1 | 0 | 0 | 0 | 0 | 0 | 0 | 0 | 0 |
| 65 | 0 | 0,00 | 0 | 4,8 | 38,10 | 126 | 0 | 0 | 114 | 5  | 3 | 1 | 1 | 0 | 0 | 1 | 0 | 0 | 0 | 0 | 0 |
| 79 | 1 | 0,00 | 0 | 5,0 | 24,57 | 98  | 0 | 0 | 186 | 9  | 3 | 1 | 0 | 0 | 0 | 1 | 0 | 0 | 0 | 0 | 0 |
| 88 | 1 | 0,00 | 0 | 5,4 | 18,37 | 80  | 0 | 0 | 139 | 1  | 3 | 1 | 0 | 0 | 1 | 1 | 0 | 0 | 0 | 0 | 0 |
| 79 | 0 | 0,00 | 0 | 5,1 | 33,33 | 100 | 0 | 0 | 142 | 5  | 3 | 1 | 0 | 0 | 0 | 1 | 0 | 0 | 0 | 0 | 0 |
| 76 | 0 | 0,00 | 0 | 4,3 | 32,87 | 101 | 0 | 0 | 101 | 5  | 3 | 1 | 0 | 0 | 0 | 1 | 0 | 0 | 0 | 0 | 3 |
| 79 | 0 | 0,00 | 0 | 5,2 |       |     | 0 | 0 | 114 | 12 | 3 | 0 | 1 | 1 | 0 | 1 | 0 | 0 | 0 | 0 | 0 |
| 82 | 0 | 0,00 | 0 | 4,7 | 24,44 | 103 | 0 | 0 | 140 | 3  | 3 | 1 | 0 | 0 | 0 | 1 | 0 | 0 | 0 | 0 | 2 |
| 72 | 1 | 0,00 | 0 | 5,1 | 23,61 | 86  | 0 | 0 | 104 | 3  | 3 | 1 | 0 | 0 |   | 1 | 1 | 0 | 0 | 0 | 0 |
| 82 | 0 | 0,00 | 0 | 4,7 | 23,14 | 78  | 0 | 0 | 89  | 11 | 3 | 0 | 0 | 0 | 0 | 0 | 0 | 0 | 0 | 0 | 1 |
| 83 | 0 | 0,00 | 0 | 4,7 | 27,53 | 76  | 0 | 0 | 107 | 12 | 3 | 0 | 0 | 0 | 0 | 1 | 0 | 0 | 0 | 0 | 1 |
| 75 | 1 | 0,00 | 0 | 5,3 | 26,26 | 108 | 0 | 0 | 113 | 12 | 3 | 0 | 0 | 0 | 0 | 1 | 0 | 0 | 0 | 0 | 0 |
| 63 | 0 | 0,00 | 0 | 5,1 | 30,67 | 83  | 0 | 0 | 115 | 4  | 3 | 1 | 0 | 0 | 0 | 1 | 0 | 0 | 0 | 0 | 1 |
| 92 | 1 | 0,00 | 0 | 4,9 | 28,29 | 112 | 0 | 0 | 115 | 5  | 3 | 1 | 0 | 0 | 1 | 0 | 0 | 0 | 0 | 0 | 3 |
| 83 | 0 | 0,00 | 0 | 4,7 | 23,92 | 83  | 0 | 0 | 85  | 7  | 3 | 1 | 1 | 0 | 0 | 1 | 0 | 0 | 0 | 0 | 3 |
| 83 | 0 | 0,00 | 0 | 4,9 | 36,52 |     | 0 | 0 | 133 | 20 | 3 | 1 | 0 | 0 | 0 | 1 | 0 | 0 | 0 | 0 | 0 |
| 73 | 1 | 0,00 | 0 | 4,7 | 27,43 | 100 | 0 | 0 | 99  | 7  | 3 | 0 | 0 | 0 | 0 | 0 | 0 | 0 | 0 | 0 | 0 |
| 88 | 1 | 0,00 | 0 | 5,0 | 22,15 | 90  | 0 | 0 | 97  | 4  | 3 | 0 | 0 | 0 | 0 | 1 | 0 | 0 | 0 | 0 | 0 |
| 83 | 0 | 0,00 | 0 | 5,5 | 32,89 | 97  | 0 | 0 | 140 | 21 | 3 | 1 | 1 | 0 | 0 | 1 | 0 | 0 | 0 | 0 | 0 |
| 78 | 0 | 0,00 | 0 | 4,7 | 28,13 | 88  | 0 | 0 | 100 | 8  | 3 | 0 | 0 | 0 | 0 | 0 | 0 | 0 | 0 | 0 | 0 |
| 59 | 1 | 0,00 | 0 | 4,9 | 27,55 | 83  | 0 | 0 | 107 | 5  | 3 | 0 | 0 | 0 | 0 | 1 | 0 | 1 | 0 | 0 | 0 |
| 85 | 1 | 0,00 | 0 | 5,3 | 31,25 | 100 | 0 | 0 | 198 | 11 | 3 | 0 | 0 | 0 | 0 | 1 | 0 | 0 | 0 | 0 | 0 |
| 77 | 0 | 0,00 | 0 | 4,7 | 36,05 | 106 | 0 | 0 | 106 | 5  | 3 | 1 | 0 | 0 | 1 | 1 | 0 | 0 | 0 | 0 | 0 |
| 85 | 1 | 0,00 | 0 | 4,5 | 20,54 | 73  | 0 | 0 | 89  | 6  | 3 | 0 | 1 | 0 | 0 | 1 | 1 | 1 | 0 | 0 | 0 |
| 90 | 0 | 0,00 | 0 | 5,2 | 33,23 | 96  | 0 | 0 | 117 | 20 | 3 | 1 | 0 | 0 | 0 | 1 | 0 | 0 | 0 | 0 | 0 |
| 82 | 0 | 0,00 | 0 | 4,9 | 30,47 | 104 | 0 | 0 | 98  | 6  | 3 | 1 | 1 | 1 | 0 | 1 | 0 | 0 | 0 | 0 | 0 |

|    |   |      |   |     |       |     |   |   |     |    |   |   |   |   |   |   |   |   |   |   |   |
|----|---|------|---|-----|-------|-----|---|---|-----|----|---|---|---|---|---|---|---|---|---|---|---|
| 79 | 1 | 0,00 | 0 | 4,0 | 29,23 | 116 | 0 | 0 | 95  | 9  | 3 | 1 | 0 | 0 | 0 | 1 | 1 | 1 | 0 | 0 | 2 |
| 80 | 1 | 0,00 | 0 | 4,8 | 30,90 | 90  | 0 | 0 | 115 | 13 | 3 | 1 | 0 | 0 | 0 | 0 | 0 | 0 | 0 | 0 | 0 |
| 90 | 1 | 0,00 | 0 | 4,8 | 24,03 | 80  | 0 | 0 | 112 | 8  | 3 | 0 | 0 | 0 | 0 | 0 | 1 | 1 | 0 | 0 | 0 |
| 85 | 0 | 0,00 | 0 | 5,2 | 28,89 | 94  | 0 | 0 | 156 | 18 | 3 | 1 | 0 | 0 | 0 | 1 | 0 | 0 | 0 | 0 | 0 |
| 55 | 0 | 0,00 | 0 | 5,2 | 25,97 | 82  | 0 | 0 | 98  | 5  | 3 | 0 | 0 | 0 | 0 | 1 | 0 | 0 | 0 | 0 | 1 |
| 73 | 0 | 0,00 | 0 | 4,8 | 27,03 | 103 | 0 | 0 | 90  | 16 | 3 | 0 | 0 | 0 | 0 | 1 | 0 | 0 | 0 | 0 | 0 |
| 86 | 0 | 0,00 | 0 | 4,7 |       |     | 0 | 0 | 131 | 19 | 3 | 1 | 0 | 1 | 0 | 1 | 0 | 0 | 0 | 0 | 0 |
| 88 | 0 | 0,00 | 0 | 4,6 | 22,22 | 65  | 0 | 0 | 104 | 16 | 3 | 1 |   | 0 | 0 | 1 | 0 | 0 | 0 | 0 | 3 |
| 87 | 0 | 0,00 | 0 | 4,9 | 25,71 | 85  | 0 | 0 | 95  | 3  | 3 | 1 | 0 | 0 | 0 | 1 | 0 | 0 | 0 | 0 | 0 |
| 84 | 1 | 0,00 | 0 | 5,2 |       |     | 0 | 0 | 130 | 4  | 3 | 1 | 0 | 0 | 0 | 0 | 0 | 1 | 0 | 0 | 1 |
| 42 | 0 | 0,00 | 0 | 4,4 | 24,34 | 90  | 0 | 0 | 92  | 13 | 3 | 1 | 0 | 0 | 1 | 0 | 1 | 1 | 0 | 0 | 0 |
| 68 | 0 | 0,00 | 0 | 5,2 |       |     | 0 | 0 | 148 | 8  | 3 | 1 | 0 | 0 | 0 | 1 | 0 | 0 | 0 | 0 | 0 |
| 76 | 0 | 0,00 | 0 | 5,2 | 24,82 | 83  | 0 | 0 | 138 | 21 | 3 | 0 | 0 | 0 | 0 | 1 | 0 | 0 | 0 | 0 | 0 |
| 85 | 1 | 0,00 | 0 | 5,6 |       |     | 0 | 0 | 98  | 7  | 3 | 1 | 0 | 0 | 1 | 1 | 0 | 0 | 0 | 0 | 2 |
| 82 | 0 | 0,00 | 0 | 5,5 |       |     | 0 | 0 | 99  | 7  | 3 | 1 | 1 | 0 | 0 | 1 | 0 |   | 0 | 0 | 3 |
| 73 | 0 | 0,00 | 0 | 4,8 | 23,74 | 109 | 0 | 0 | 106 | 1  | 3 | 1 | 0 | 0 | 0 | 1 | 0 | 0 | 0 | 0 | 0 |
| 55 | 1 | 0,00 | 0 | 5,5 | 39,89 | 130 | 0 | 0 | 96  | 0  | 3 | 1 | 0 | 0 | 0 | 0 | 0 | 1 | 0 | 0 | 0 |
| 85 | 0 | 0,00 | 0 | 5,2 | 20,00 |     | 0 | 0 | 100 | 2  | 3 | 1 | 0 | 0 | 0 | 1 | 0 | 0 | 0 | 0 | 0 |
| 81 | 0 | 0,00 | 0 | 5,0 | 30,04 | 98  | 0 | 0 | 114 | 3  | 3 | 0 | 1 | 0 | 0 | 1 | 0 | 0 | 0 | 0 | 3 |
| 98 | 0 | 0,00 | 0 | 4,7 |       |     | 0 | 0 | 125 | 20 | 3 | 1 | 0 | 0 | 0 | 1 | 0 | 0 | 0 | 0 | 3 |
| 64 | 0 | 0,00 | 0 | 5,0 | 26,14 |     | 0 | 0 | 120 | 20 | 3 | 0 | 0 | 0 | 0 | 1 | 0 | 0 | 0 | 0 | 0 |
| 82 | 0 | 0,00 | 0 | 5,0 |       |     | 0 | 0 | 90  | 10 | 3 | 1 | 0 | 0 | 0 | 1 | 0 | 0 | 0 | 0 | 3 |
| 73 | 1 | 0,00 | 0 | 5,3 | 25,46 |     | 0 | 0 | 81  | 6  | 3 | 1 | 1 | 1 | 0 | 1 | 0 | 1 | 0 | 0 | 0 |
| 86 | 0 | 0,00 | 0 | 5,5 |       |     | 0 | 0 | 137 | 3  | 3 | 1 | 0 | 0 | 0 | 0 | 0 | 0 | 0 | 0 | 0 |
| 54 | 1 | 0,00 | 0 | 5,2 | 28,41 |     | 0 | 0 | 118 | 12 | 3 | 1 | 0 | 0 | 0 | 0 | 1 | 1 | 0 | 0 | 0 |
| 85 | 0 | 0,00 | 0 | 5,5 | 27,34 | 88  | 0 | 0 | 145 | 5  | 3 | 1 | 0 | 0 | 0 | 1 | 1 | 0 | 0 | 0 | 3 |
| 87 | 0 | 0,00 | 0 | 5,6 |       |     | 0 | 0 | 122 | 20 | 3 | 1 | 0 | 0 | 0 | 1 | 0 | 0 | 0 | 0 | 0 |
| 74 | 1 | 0,00 | 0 | 5,5 | 25,51 | 108 | 0 | 0 | 182 | 6  | 3 | 0 | 1 | 0 | 0 | 1 | 0 | 0 | 0 | 0 | 0 |
| 93 | 0 | 0,00 | 0 | 5,6 | 24,00 | 79  | 0 | 0 | 138 | 18 | 3 | 0 | 0 | 0 | 0 | 1 | 0 | 0 | 0 | 0 | 0 |
| 76 | 0 | 0,00 | 0 | 5,5 |       |     | 0 | 0 | 103 | 3  | 3 | 1 | 1 | 0 | 0 | 1 |   |   | 0 | 0 | 0 |
| 74 | 0 | 0,00 | 0 | 5,5 | 19,81 | 72  | 0 | 0 | 84  | 9  | 3 | 1 | 0 | 0 | 1 | 0 |   | 0 | 0 | 0 | 0 |
| 82 | 0 | 0,00 | 0 | 5,3 | 36,44 | 115 | 0 | 0 | 87  | 7  | 3 | 1 | 0 | 0 | 0 | 1 | 0 | 0 | 0 | 0 | 1 |
| 70 | 0 | 0,00 | 0 | 5,2 | 29,27 | 110 | 0 | 0 | 83  | 18 | 3 | 1 | 0 | 0 | 0 | 1 | 0 | 0 | 0 | 0 | 0 |
| 73 | 0 | 0,00 | 0 | 5,5 | 34,48 | 130 | 0 | 0 | 144 | 15 | 3 | 1 | 1 | 0 | 0 | 1 | 0 | 0 | 0 | 0 | 0 |
| 75 | 1 | 0,00 | 0 | 5,6 | 29,38 | 110 | 0 | 0 | 194 | 3  | 3 | 1 | 0 | 0 | 0 | 1 | 1 | 0 | 0 | 0 | 2 |
| 29 | 1 | 0,00 | 0 | 5,2 | 24,34 | 89  | 0 | 0 | 104 | 3  | 3 | 1 | 0 | 1 | 0 | 0 | 0 | 0 | 0 | 0 | 0 |
| 73 | 0 | 0,00 | 0 | 5,6 | 25,39 | 95  | 0 | 0 | 173 | 4  | 3 | 1 | 1 | 0 | 0 | 1 | 0 | 0 | 0 | 0 | 0 |



|    |   |      |   |     |       |     |   |   |     |    |   |   |   |   |   |   |   |   |   |   |
|----|---|------|---|-----|-------|-----|---|---|-----|----|---|---|---|---|---|---|---|---|---|---|
| 69 | 0 | 1,00 | 1 | 5,4 | 27,06 | 92  | 0 | 0 | 124 | 4  | 3 | 1 | 0 | 0 | 0 | 1 | 0 | 0 | 0 | 0 |
| 83 | 1 | 1,00 | 1 | 5,8 | 32,05 | 98  | 0 | 0 | 132 | 2  | 3 | 1 | 0 | 0 | 0 | 1 | 1 | 0 | 0 | 0 |
| 50 | 1 | 1,00 | 1 | 5,5 | 28,68 |     | 0 | 0 | 147 | 1  | 3 | 0 | 1 | 0 | 1 | 0 | 0 | 1 | 0 | 1 |
| 74 | 0 | 1,00 | 1 | 5,7 | 30,83 | 116 | 0 | 0 | 112 | 1  | 3 | 1 | 0 | 0 | 0 | 1 | 0 | 0 | 0 | 0 |
| 75 | 0 | 1,00 | 1 | 5,6 | 40,00 | 104 | 0 | 0 | 121 | 3  | 3 | 1 | 1 | 0 | 0 | 1 | 0 | 0 | 0 | 0 |
| 79 | 0 | 1,00 | 1 | 5,5 | 27,68 | 110 | 0 | 0 | 111 | 13 | 3 | 0 | 0 | 0 | 0 | 0 | 0 | 0 | 0 | 2 |
| 66 | 0 | 1,00 | 1 | 5,8 | 25,34 | 98  | 0 | 0 | 124 | 18 | 3 | 1 | 1 | 0 | 0 | 1 | 1 | 0 | 0 | 0 |
| 77 | 0 | 1,00 | 1 | 6,2 | 26,49 | 98  | 0 | 0 | 214 | 18 | 3 | 1 | 0 | 0 | 0 | 1 | 0 | 0 | 0 | 3 |
| 79 | 0 | 1,00 | 1 | 5,8 | 28,58 |     | 0 | 0 | 130 | 21 | 3 | 1 | 1 | 0 | 0 | 1 | 0 | 0 | 0 | 0 |
| 70 | 1 | 1,00 | 1 | 5,9 | 26,72 | 99  | 0 | 0 | 123 | 7  | 3 | 1 | 1 | 0 | 0 | 1 | 1 | 0 | 0 | 0 |
| 76 | 0 | 1,00 | 1 | 5,3 | 29,55 |     | 0 | 0 | 98  | 12 | 3 | 1 | 0 | 0 | 0 | 1 | 0 | 0 | 0 | 3 |
| 80 | 0 | 1,00 | 1 | 6,0 | 33,20 | 113 | 0 | 0 | 107 | 11 | 3 | 1 | 1 | 0 | 1 | 1 | 0 | 0 | 0 | 0 |
| 92 | 1 | 1,00 | 1 | 5,9 | 22,37 | 80  | 0 | 0 | 89  | 8  | 3 | 0 | 0 | 0 | 0 | 1 | 1 | 0 | 0 | 0 |
| 88 | 0 | 1,00 | 1 | 6,0 | 29,90 | 94  | 0 | 0 | 128 | 13 | 3 | 0 | 0 | 0 | 0 | 1 | 0 | 0 | 0 | 0 |
| 63 | 0 | 1,00 | 1 | 5,8 | 32,89 | 106 | 0 | 0 | 107 | 14 | 3 | 0 | 1 | 0 | 0 | 1 | 0 | 0 | 0 | 0 |
| 66 | 0 | 1,00 | 1 | 5,8 | 35,06 | 110 | 0 | 0 | 165 | 7  | 3 | 0 | 0 | 0 | 0 | 1 | 0 | 0 | 0 | 0 |
| 78 | 0 | 1,00 | 1 | 6,0 | 24,97 | 80  | 0 | 0 | 102 | 17 | 3 | 1 | 1 | 0 | 0 | 1 | 0 | 0 | 0 | 1 |
| 77 | 0 | 1,00 | 1 | 5,8 | 27,34 | 110 | 0 | 0 | 135 | 15 | 3 | 1 | 1 | 0 | 1 | 1 | 0 | 0 | 0 | 0 |
| 75 | 0 | 1,00 | 1 | 5,8 | 27,82 |     | 0 | 0 | 101 | 12 | 3 | 1 | 0 | 0 | 0 | 1 | 0 | 0 | 0 | 0 |
| 87 | 0 | 1,00 | 1 | 5,9 | 42,67 | 80  | 0 | 0 | 115 | 4  | 3 | 1 | 1 | 0 | 0 | 1 | 0 | 0 | 0 | 3 |
| 67 | 0 | 1,00 | 1 | 5,8 | 30,08 | 97  | 0 | 0 | 107 | 3  | 3 | 1 | 1 | 0 | 1 | 1 | 0 | 0 | 0 | 1 |
| 82 | 0 | 1,00 | 1 | 6,0 | 28,69 | 93  | 0 | 0 | 138 | 17 | 3 | 0 | 0 | 0 | 0 | 1 | 0 | 0 | 0 | 0 |
| 49 | 1 | 1,00 | 1 | 6,0 | 24,06 |     | 0 | 0 | 107 | 2  | 3 | 0 | 0 | 0 | 0 | 0 | 1 | 1 | 0 | 0 |
| 65 | 1 | 1,00 | 1 | 5,9 | 29,39 | 112 | 0 | 0 | 122 | 23 | 3 | 0 | 0 | 0 | 0 | 1 | 0 | 0 | 0 | 0 |
| 90 | 0 | 1,00 | 1 | 5,7 |       |     | 0 | 0 | 112 | 2  | 3 | 1 | 1 | 1 | 0 | 1 | 0 | 0 | 0 | 1 |
| 85 | 0 | 1,00 | 1 | 5,8 | 23,37 |     | 0 | 0 | 149 | 3  | 3 | 1 | 0 | 0 | 0 | 1 | 0 | 0 | 0 | 1 |
| 79 | 0 | 1,00 | 1 | 5,8 | 25,43 | 100 | 0 | 0 | 84  | 5  | 3 | 1 | 1 | 0 | 0 | 1 | 0 | 0 | 0 | 1 |
| 80 | 0 | 1,00 | 1 | 6,0 | 38,22 | 126 | 0 | 0 | 123 | 5  | 3 | 1 | 0 | 0 | 0 | 1 | 0 | 0 | 0 | 1 |
| 84 | 0 | 1,00 | 1 | 5,8 | 24,44 | 92  | 0 | 0 | 190 | 3  | 3 | 1 | 1 | 1 | 0 | 1 | 0 | 0 | 0 | 3 |
| 82 | 0 | 1,00 | 1 | 6,0 | 31,25 | 98  | 0 | 0 | 120 | 19 | 3 | 1 | 1 | 0 | 0 | 1 | 0 | 0 | 0 | 1 |
| 82 | 1 | 1,00 | 1 | 5,8 |       |     | 0 | 0 | 108 | 22 | 3 | 1 | 1 | 0 | 0 | 1 | 0 | 0 | 0 | 3 |
| 78 | 0 | 1,00 | 1 | 6,0 | 26,73 | 96  | 0 | 0 | 108 | 20 | 3 | 0 | 0 | 0 | 0 | 1 | 0 | 0 | 0 | 3 |
| 61 | 1 | 1,00 | 1 | 5,9 | 28,91 | 97  | 0 | 0 | 108 | 19 | 3 | 1 | 1 | 0 | 0 | 1 | 0 | 0 | 0 | 0 |
| 56 | 0 | 1,00 | 1 | 6,3 | 36,72 | 113 | 0 | 0 | 127 | 17 | 3 | 1 | 0 | 0 | 0 | 1 | 1 | 1 | 0 | 0 |
| 86 | 0 | 1,00 | 1 | 6,0 | 30,18 | 104 | 0 | 0 | 128 | 3  | 3 | 0 | 0 | 0 | 0 | 1 | 0 | 0 | 0 | 0 |
| 87 | 0 | 1,00 | 1 | 6,3 | 24,44 | 97  | 0 | 0 | 157 | 8  | 3 | 1 | 0 | 0 | 1 | 1 | 0 | 0 | 0 | 1 |
| 87 | 0 | 1,00 | 1 | 5,8 | 21,78 | 90  | 0 | 0 | 126 | 5  | 3 | 1 | 0 | 0 | 0 | 1 | 0 | 0 | 0 | 0 |







|    |   |      |   |     |       |     |   |    |     |    |   |   |   |   |   |   |   |   |   |   |
|----|---|------|---|-----|-------|-----|---|----|-----|----|---|---|---|---|---|---|---|---|---|---|
| 42 | 1 | 0,00 | 0 | 4,3 |       | 0   | 0 | 83 | 1   | 4  | 0 | 1 | 0 | 0 | 0 | 0 | 1 | 0 | 0 | 0 |
| 46 | 1 | 0,00 | 0 | 5,2 | 17,58 | 76  | 0 | 0  | 178 | 10 | 4 | 1 | 0 | 0 | 0 | 0 | 0 | 0 | 0 | 0 |
| 79 | 0 | 0,00 | 0 | 4,8 | 33,33 | 103 | 0 | 0  | 128 | 0  | 4 | 1 | 1 | 0 | 0 | 0 | 0 | 0 | 0 | 1 |
| 85 | 0 | 0,00 | 0 | 4,6 | 20,40 | 63  | 0 | 0  | 85  | 2  | 4 | 1 | 0 | 0 | 0 | 0 | 0 | 0 | 0 | 1 |
| 97 | 0 | 0,00 | 0 | 4,3 | 22,89 | 95  | 0 | 0  | 116 | 12 | 4 | 1 | 0 | 0 | 1 | 0 | 0 | 0 | 0 | 3 |
| 86 | 1 | 0,00 | 0 | 4,7 | 23,53 | 82  | 0 | 0  | 96  | 2  | 4 | 0 | 0 | 0 | 0 | 0 | 0 | 0 | 0 | 0 |
| 52 | 1 | 0,00 | 0 | 4,7 | 26,87 | 111 | 0 | 0  | 106 | 5  | 4 | 0 | 0 | 0 | 0 | 0 | 0 | 1 | 0 | 0 |
| 44 | 1 | 0,00 | 0 | 4,8 |       | 110 | 0 | 0  | 105 | 1  | 4 | 0 | 0 | 0 | 0 | 0 | 0 | 0 | 0 | 0 |
| 88 | 1 | 0,00 | 0 | 4,7 | 24,98 | 101 | 0 | 0  | 94  | 7  | 4 | 1 | 0 | 0 | 0 | 0 | 1 | 0 | 0 | 2 |
| 93 | 0 | 0,00 | 0 | 5,6 | 23,73 | 96  | 0 | 0  | 151 | 17 | 4 | 1 | 1 | 0 | 0 | 0 | 0 | 0 | 0 | 0 |
| 86 | 0 | 0,00 | 0 | 4,6 | 29,97 | 103 | 0 | 0  | 100 | 2  | 4 | 1 | 0 | 0 | 0 | 0 | 0 | 0 | 0 | 0 |
| 47 | 0 | 0,00 | 0 | 4,8 | 32,95 | 109 | 0 | 0  | 126 | 1  | 4 | 1 | 0 | 0 | 0 | 0 | 0 | 0 | 0 | 0 |
| 69 | 0 | 0,00 | 0 | 5,1 | 34,02 | 110 | 0 | 0  | 110 | 4  | 4 | 1 | 0 | 0 | 0 | 0 | 0 | 0 | 0 | 0 |
| 77 | 0 | 0,00 | 0 | 5,0 |       | 102 | 0 | 0  | 84  | 2  | 4 | 1 | 1 | 0 | 1 | 0 | 0 | 0 | 0 | 0 |
| 78 | 1 | 0,00 | 0 | 5,3 | 23,67 | 90  | 0 | 0  | 71  | 1  | 4 | 0 | 0 | 0 | 0 | 0 | 1 | 0 | 0 | 0 |
| 81 | 0 | 0,00 | 0 | 5,6 | 29,59 | 90  | 0 | 0  | 152 | 21 | 4 | 1 | 0 | 0 | 0 | 0 | 0 | 0 | 0 | 0 |
| 82 | 0 | 0,00 | 0 | 4,8 | 31,22 | 106 | 0 | 0  | 115 | 5  | 4 | 0 | 1 | 0 | 0 | 0 | 0 | 0 | 0 | 0 |
| 75 | 1 | 0,00 | 0 | 4,8 | 31,25 | 96  | 0 | 0  | 99  | 3  | 4 | 0 | 1 | 0 | 0 | 0 | 1 | 0 | 0 | 0 |
| 77 | 1 | 0,00 | 0 | 5,5 | 31,83 | 102 | 0 | 0  | 150 | 23 | 4 | 1 | 1 | 1 | 1 | 1 | 0 | 0 | 0 | 0 |
| 70 | 0 | 0,00 | 0 | 5,0 | 26,50 | 89  | 0 | 0  | 133 | 3  | 4 | 1 | 1 | 0 | 0 | 0 | 0 | 0 | 0 | 0 |
| 49 | 1 | 0,00 | 0 | 4,4 |       | 100 | 0 | 0  | 103 | 15 | 4 | 0 | 0 | 0 | 0 | 0 | 0 | 1 | 0 | 0 |
| 75 | 1 | 0,00 | 0 | 5,5 | 32,87 | 104 | 0 | 0  | 142 | 4  | 4 | 1 | 1 | 0 | 0 | 0 | 0 | 0 | 0 | 0 |
| 67 | 1 | 0,00 | 0 | 4,9 | 28,40 | 91  | 0 | 0  | 120 | 6  | 4 | 0 | 0 | 0 | 0 | 0 | 0 | 0 | 0 | 0 |
| 78 | 0 | 0,00 | 0 | 5,2 | 25,39 | 83  | 0 | 0  | 209 | 4  | 4 | 1 | 1 | 0 | 0 | 0 | 0 | 0 | 0 | 0 |
| 80 | 1 | 0,00 | 0 | 5,1 | 25,25 | 94  | 0 | 0  | 127 | 23 | 4 | 1 | 1 | 0 | 0 | 0 | 0 | 0 | 0 | 0 |
| 53 | 1 | 0,00 | 0 | 5,0 | 25,16 | 97  | 0 | 0  | 110 | 9  | 4 | 1 | 0 | 0 | 0 | 0 | 0 | 0 | 0 | 0 |
| 68 | 1 | 0,00 | 0 | 5,6 | 25,06 |     | 0 | 0  | 102 | 3  | 4 | 0 | 0 | 0 | 0 | 0 | 1 | 0 | 0 | 0 |
| 82 | 0 | 0,00 | 0 | 4,9 | 31,22 | 100 | 0 | 0  | 94  | 3  | 4 | 1 | 0 | 0 | 0 | 0 | 0 | 0 | 0 | 0 |
| 83 | 0 | 0,00 | 0 | 4,8 |       |     | 0 | 0  | 92  | 9  | 4 | 1 | 1 | 0 | 1 | 0 | 0 | 0 | 0 | 1 |
| 68 | 1 | 0,00 | 0 | 4,8 | 25,31 |     | 0 | 0  | 102 | 20 | 4 | 1 | 0 | 0 | 0 | 0 | 1 | 1 | 0 | 0 |
| 70 | 0 | 0,00 | 0 | 4,8 | 28,52 |     | 0 | 0  | 123 | 4  | 4 | 1 | 0 | 0 | 0 | 0 | 0 | 0 | 0 | 0 |
| 78 | 1 | 0,00 | 0 | 5,2 | 19,61 |     | 0 | 0  | 139 | 3  | 4 | 1 | 1 | 0 | 0 | 0 | 0 | 0 | 0 | 0 |
| 83 | 0 | 0,00 | 0 | 5,3 | 29,59 | 92  | 0 | 0  | 106 | 14 | 4 | 0 | 0 | 0 | 0 | 0 | 0 | 0 | 0 | 0 |
| 72 | 1 | 0,00 | 0 | 4,4 | 27,55 | 93  | 0 | 0  | 116 | 12 | 4 | 1 | 0 | 0 | 0 | 1 | 0 | 0 | 0 | 2 |
| 79 | 1 | 0,00 | 0 | 4,8 | 32,27 | 111 | 0 | 0  | 122 | 2  | 4 | 1 | 1 | 0 | 1 | 0 | 1 | 0 | 0 | 0 |
| 78 | 1 | 0,00 | 0 | 5,2 | 23,89 | 103 | 0 | 0  | 106 | 6  | 4 | 1 | 0 | 0 | 0 | 0 | 0 | 0 | 0 | 0 |
| 76 | 0 | 0,00 | 0 | 5,2 | 26,06 | 100 | 0 | 0  | 115 | 9  | 4 | 1 | 1 | 0 | 0 | 0 | 0 | 0 | 0 | 0 |

|    |   |      |   |     |       |     |   |   |     |    |   |   |   |   |   |   |   |   |   |   |
|----|---|------|---|-----|-------|-----|---|---|-----|----|---|---|---|---|---|---|---|---|---|---|
| 72 | 0 | 0,00 | 0 | 4,9 | 29,72 | 99  | 0 | 0 | 95  | 2  | 4 | 1 | 0 | 0 | 0 | 0 | 0 | 0 | 0 | 0 |
| 82 | 1 | 0,00 | 0 | 5,3 | 18,73 |     | 0 | 0 | 91  | 2  | 4 | 1 | 0 | 0 | 0 | 1 | 0 | 0 | 0 | 2 |
| 72 | 1 | 0,00 | 0 | 5,3 | 24,57 | 72  | 0 | 0 | 153 | 10 | 4 | 1 | 0 | 0 | 1 | 0 | 1 | 1 | 0 | 1 |
| 60 | 1 | 0,00 | 0 | 4,9 | 25,33 |     | 0 | 0 | 97  | 6  | 4 | 0 | 1 | 0 | 0 | 0 | 1 | 1 | 0 | 1 |
| 56 | 0 | 0,00 | 0 | 5,4 |       | 99  | 0 | 0 | 215 | 16 | 4 | 0 | 0 | 0 | 0 | 0 | 0 | 0 | 0 | 0 |
| 89 | 0 | 0,00 | 0 | 5,3 | 20,81 |     | 0 | 0 | 90  | 6  | 4 | 1 | 1 | 1 | 0 | 0 | 0 | 0 | 0 | 0 |
| 80 | 1 | 0,00 | 0 | 5,2 |       |     | 0 | 0 | 227 | 16 | 4 | 1 | 0 | 0 | 0 | 0 | 0 | 0 | 0 | 0 |
| 80 | 0 | 0,00 | 0 | 5,3 |       |     | 0 | 0 | 139 | 13 | 4 | 1 | 0 | 0 | 0 | 0 | 0 | 0 | 0 | 2 |
| 76 | 0 | 0,00 | 0 | 5,3 |       |     | 0 | 0 | 97  | 2  | 4 | 1 | 0 | 0 | 0 | 1 | 0 | 0 | 0 | 3 |
| 64 | 0 | 0,00 | 0 | 5,4 |       |     | 0 | 0 | 102 | 16 | 4 | 1 | 1 | 0 | 0 | 0 |   | 1 | 0 | 0 |
| 70 | 0 | 0,00 | 0 | 5,5 |       |     | 0 | 0 | 103 | 7  | 4 | 1 | 1 | 0 | 0 | 0 | 0 | 0 | 0 | 0 |
| 56 | 1 | 0,00 | 0 | 5,4 | 27,55 | 98  | 0 | 0 | 185 | 19 | 4 | 0 | 0 | 0 | 0 | 0 | 0 | 1 | 0 | 2 |
| 42 | 1 | 0,00 | 0 | 5,2 | 28,06 | 105 | 0 | 0 | 104 | 5  | 4 | 0 | 0 | 0 | 0 | 0 | 0 | 0 | 0 | 0 |
| 89 | 0 | 0,00 | 0 | 5,6 |       |     | 0 | 0 | 105 | 12 | 4 | 1 | 1 | 0 | 0 | 1 | 0 | 0 | 0 | 3 |
| 89 | 0 | 0,00 | 0 | 5,6 |       |     | 0 | 0 | 106 | 7  | 4 | 1 | 0 | 0 | 0 | 0 |   |   | 0 | 3 |
| 66 | 0 | 0,00 | 0 | 5,6 | 29,78 | 91  | 0 | 0 | 103 | 17 | 4 | 0 | 1 | 0 | 0 | 0 | 0 | 0 | 0 | 0 |
| 50 | 0 | 0,00 | 0 | 5,2 | 23,12 | 86  | 0 | 0 | 78  | 10 | 4 | 0 | 0 | 0 | 0 | 0 | 1 | 1 | 0 | 0 |
| 83 | 1 | 0,00 | 0 | 5,3 | 27,92 | 104 | 0 | 0 | 95  | 2  | 4 | 1 | 0 | 0 | 1 | 0 | 0 | 0 | 0 | 0 |
| 51 | 1 | 0,00 | 0 | 5,6 | 29,63 |     | 0 | 0 | 105 | 8  | 4 | 0 | 1 | 0 | 0 | 0 | 0 | 1 | 0 | 0 |
| 74 | 0 | 0,00 | 0 | 5,4 | 28,44 |     | 0 | 0 | 134 | 1  | 4 | 0 | 0 | 0 | 0 | 0 | 0 | 0 | 0 | 0 |
| 81 | 1 | 0,00 | 0 | 5,2 | 23,99 | 94  | 0 | 0 | 184 | 1  | 4 | 1 | 1 | 0 | 1 | 0 | 0 | 0 | 0 | 0 |
| 82 | 1 | 0,00 | 0 | 5,2 |       |     | 0 | 0 | 94  | 10 | 4 | 1 | 0 | 0 | 0 | 0 | 0 | 0 | 0 | 0 |
| 80 | 0 | 0,00 | 0 | 5,6 | 28,44 | 102 | 0 | 0 | 83  | 5  | 4 | 1 | 0 | 0 | 0 | 0 | 0 | 0 | 0 | 1 |
| 75 | 0 | 0,00 | 0 | 5,5 | 29,24 | 105 | 0 | 0 | 136 | 16 | 4 | 0 | 0 | 0 | 0 | 0 | 0 | 0 | 0 | 0 |
| 50 | 1 | 0,00 | 0 | 5,6 | 24,49 | 82  | 0 | 0 | 109 | 4  | 4 | 0 | 0 | 0 | 0 | 0 | 1 | 1 | 0 | 0 |
| 56 | 1 | 0,00 | 0 | 5,4 | 25,85 | 89  | 0 | 0 | 115 | 3  | 4 | 0 | 1 | 0 | 0 | 0 |   | 1 | 0 | 3 |
| 72 | 0 | 0,00 | 0 | 5,3 | 24,46 | 90  | 0 | 0 | 101 | 2  | 4 | 0 | 1 | 0 | 0 | 0 | 0 | 0 | 0 | 0 |
| 37 | 1 | 0,00 | 0 | 5,0 | 25,44 | ### | 0 | 0 | 100 | 2  | 4 | 0 | 0 | 0 | 0 | 0 | 0 | 0 | 0 | 0 |
| 85 | 0 | 0,00 | 0 | 5,4 | 20,81 |     | 0 | 0 | 109 | 10 | 4 | 1 | 0 | 0 | 0 | 0 | 0 | 0 | 0 | 3 |
| 70 | 0 | 0,00 | 0 | 5,2 | 22,04 | 76  | 0 | 0 | 100 | 23 | 4 | 1 | 1 | 0 | 0 | 0 | 0 | 0 | 0 | 0 |
| 70 | 0 | 0,00 | 0 | 5,0 | 36,33 | 114 | 0 | 0 | 130 | 6  | 4 | 1 | 0 | 0 | 0 | 0 | 0 | 0 | 0 | 0 |
| 32 | 1 | 0,00 | 0 | 5,2 | 24,44 | 87  | 0 | 0 | 98  | 7  | 4 | 0 | 0 | 0 | 0 | 0 |   | 1 | 0 | 0 |
| 75 | 1 | 0,00 | 0 | 5,4 | 24,80 | 100 | 0 | 0 | 90  | 7  | 4 | 1 | 1 | 0 | 0 | 1 | 0 | 0 | 0 | 3 |
| 65 | 0 | 0,00 | 0 | 5,6 | 17,26 | 82  | 0 | 0 | 90  | 2  | 4 | 1 | 0 | 0 | 0 | 0 | 1 | 1 | 0 | 0 |
| 77 | 0 | 0,00 | 0 | 5,5 | 38,21 | 118 | 0 | 0 | 110 | 12 | 4 | 1 | 0 | 0 | 0 | 0 | 0 | 0 | 0 | 0 |
| 32 | 1 | 0,00 | 0 | 5,1 | 23,55 | 70  | 0 | 0 | 100 | 0  | 4 | 0 | 0 | 0 | 0 | 0 | 0 | 0 | 0 | 0 |
| 86 | 0 | 0,00 | 0 | 5,6 | 27,12 | 98  | 0 | 0 | 104 | 5  | 4 | 1 | 1 | 0 | 0 | 0 | 0 | 0 | 0 | 3 |



|    |   |      |   |     |       |     |   |   |     |    |   |   |   |   |   |   |   |   |   |   |
|----|---|------|---|-----|-------|-----|---|---|-----|----|---|---|---|---|---|---|---|---|---|---|
| 73 | 1 | 1,00 | 1 | 6,0 | 39,06 | 125 | 0 | 0 | 91  | 2  | 4 | 1 | 1 | 0 | 0 | 0 | 0 | 0 | 0 | 1 |
| 87 | 0 | 1,00 | 1 | 6,0 | 27,26 | 98  | 0 | 0 | 96  | 4  | 4 | 0 | 1 | 0 | 0 | 0 | 0 | 0 | 0 | 1 |
| 75 | 0 | 1,00 | 1 | 5,9 | 29,14 | 108 | 0 | 0 | 104 | 24 | 4 | 1 | 0 | 0 | 0 | 0 | 1 | 0 | 0 | 0 |
| 75 | 0 | 1,00 | 1 | 6,0 | 23,73 | 98  | 0 | 0 | 142 | 5  | 4 | 1 | 1 | 0 | 0 | 0 | 0 | 0 | 0 | 0 |
| 61 | 1 | 1,00 | 1 | 6,0 | 21,67 | 81  | 0 | 0 | 86  | 2  | 4 | 1 | 0 | 0 | 0 | 1 | 0 | 1 | 0 | 0 |
| 56 | 1 | 1,00 | 1 | 6,4 | 25,06 | 108 | 0 | 0 | 126 | 7  | 4 | 1 | 0 | 0 | 0 | 0 | 0 | 0 | 0 | 0 |
| 84 | 1 | 1,00 | 1 | 6,4 | 23,56 | 92  | 0 | 0 | 90  | 14 | 4 | 1 | 0 | 0 | 0 | 0 | 1 | 0 | 0 | 0 |
| 75 | 0 | 1,00 | 1 | 6,1 | 27,25 |     | 0 | 0 | 144 | 13 | 4 | 0 | 0 | 0 | 1 | 0 | 0 | 0 | 0 | 0 |
| 87 | 0 | 1,00 | 1 | 6,0 | 21,88 |     | 0 | 0 | 90  | 8  | 4 | 1 | 0 | 0 | 0 | 0 | 0 | 0 | 0 | 0 |
| 80 | 0 | 1,00 | 1 | 6,3 | 22,27 | 90  | 0 | 0 | 107 | 8  | 4 | 1 | 0 | 0 | 0 | 0 | 0 | 0 | 0 | 0 |
| 74 | 1 | 1,00 | 1 | 5,9 |       | 50  | 0 | 0 | 96  | 14 | 4 | 0 | 0 | 0 | 0 | 0 | 1 | 0 | 0 | 1 |
| 90 | 1 | 1,00 | 1 | 5,8 | 27,34 | 91  | 0 | 0 | 112 | 14 | 4 | 1 | 0 | 0 | 1 | 0 | 0 | 0 | 0 | 0 |
| 83 | 1 | 1,00 | 1 | 6,3 | 24,51 | 104 | 0 | 0 | 111 | 21 | 4 | 1 | 1 | 0 | 1 | 0 | 1 | 0 | 0 | 2 |
| 88 | 1 | 1,00 | 1 | 5,7 | 20,45 |     | 0 | 0 | 95  | 7  | 4 | 1 | 1 | 0 | 1 | 0 | 0 | 0 | 0 | 0 |
| 62 | 1 | 1,00 | 1 | 6,1 | 17,30 | 84  | 0 | 0 | 100 | 5  | 4 | 0 | 1 | 0 | 0 | 0 | 1 | 1 | 0 | 0 |
| 46 | 0 | 1,00 | 1 | 5,9 | 20,55 |     | 0 | 0 | 128 | 12 | 4 | 0 | 1 | 0 | 0 | 0 | 0 | 1 | 0 | 0 |
| 61 | 1 | 1,00 | 1 | 6,0 | 29,07 |     | 0 | 0 | 89  | 8  | 4 | 1 | 1 | 0 | 1 | 0 | 1 | 1 | 0 | 0 |
| 71 | 1 | 1,00 | 1 | 5,9 | 30,86 | 108 | 0 | 0 | 98  | 3  | 4 | 0 | 0 | 0 | 0 | 1 | 0 | 0 | 0 | 0 |
| 46 | 0 | 1,00 | 1 | 6,0 | 26,57 | 80  | 0 | 0 | 102 | 15 | 4 | 0 | 0 | 0 | 0 | 0 | 0 | 1 | 0 | 0 |
| 41 | 1 | 1,00 | 1 | 5,9 | 19,49 | 66  | 0 | 0 | 93  | 15 | 4 | 0 | 0 | 0 | 0 | 0 | 0 | 1 | 0 | 0 |
| 79 | 1 | 1,00 | 1 | 5,7 | 26,22 | 103 | 0 | 0 | 117 | 13 | 4 | 0 | 0 | 0 | 0 | 0 | 1 | 0 | 0 | 0 |
| 86 | 0 | 1,00 | 1 | 6,1 | 36,44 | 110 | 0 | 0 | 136 | 10 | 4 | 1 | 0 | 0 | 0 | 0 | 0 | 0 | 0 | 3 |
| 79 | 0 | 1,00 | 1 | 5,9 | 29,34 | 116 | 0 | 0 | 112 | 5  | 4 | 1 | 0 | 0 | 0 | 0 | 0 | 0 | 0 | 0 |
| 71 | 0 | 1,00 | 1 | 5,9 | 31,74 | 107 | 0 | 0 | 104 | 15 | 4 | 1 | 0 | 0 | 0 | 0 | 0 | 0 | 0 | 0 |
| 87 | 0 | 1,00 | 1 | 5,9 | 22,66 | 73  | 0 | 0 | 93  | 21 | 4 | 0 | 0 | 0 | 0 | 0 | 0 | 0 | 0 | 3 |
| 88 | 0 | 1,00 | 1 | 6,2 | 26,48 | 62  | 0 | 0 | 191 | 7  | 4 | 1 | 0 | 0 | 0 | 1 | 0 | 0 | 0 | 3 |
| 76 | 1 | 1,00 | 1 | 5,8 | 33,22 | 107 | 0 | 0 | 140 | 19 | 4 | 1 | 0 | 0 | 0 | 0 | 1 | 1 | 0 | 1 |
| 80 | 1 | 1,00 | 1 | 6,1 | 25,59 | 108 | 0 | 0 | 122 | 13 | 4 | 0 | 1 | 1 | 0 | 0 | 0 | 1 | 0 | 2 |
| 86 | 0 | 1,00 | 1 | 5,9 | 28,91 |     | 0 | 0 | 121 | 1  | 4 | 1 | 1 | 0 | 0 | 0 | 0 | 0 | 0 | 2 |
| 67 | 1 | 1,00 | 1 | 5,7 | 27,68 |     | 0 | 0 | 152 | 7  | 4 | 0 | 1 | 1 | 1 | 0 | 1 | 0 | 0 | 1 |
| 85 | 1 | 1,00 | 1 | 6,0 | 27,18 | 120 | 0 | 0 | 97  | 4  | 4 | 1 | 1 | 0 | 1 | 1 | 0 | 0 | 0 | 2 |
| 73 | 0 | 1,00 | 1 | 5,7 | 28,91 | 110 | 0 | 0 | 102 | 1  | 4 | 1 | 0 | 0 | 1 | 0 | 0 | 0 | 0 | 1 |
| 74 | 1 | 1,00 | 1 | 6,4 | 39,09 | 185 | 0 | 0 | 97  | 2  | 4 | 1 | 0 | 0 | 1 | 1 | 0 | 0 | 0 | 1 |
| 50 | 1 | 1,00 | 1 | 5,7 | 31,67 |     | 0 | 0 | 101 | 23 | 4 | 0 | 0 | 0 | 0 | 0 | 1 | 1 | 0 | 0 |
| 84 | 1 | 1,00 | 1 | 6,1 | 24,69 | 95  | 0 | 0 | 120 | 6  | 4 | 1 | 1 | 0 | 0 | 0 | 0 | 0 | 0 | 3 |
| 62 | 1 | 1,00 | 1 | 5,8 | 40,75 | 122 | 0 | 0 | 175 | 3  | 4 | 1 | 1 | 0 | 0 | 0 | 0 | 1 | 0 | 3 |
| 65 | 1 | 1,00 | 1 | 5,7 | 21,71 | 109 | 0 | 0 | 123 | 5  | 4 | 1 | 0 | 0 | 0 | 0 | 0 | 0 | 0 | 2 |
